# Supplementary material for: Molecular Profiling of Docetaxel-Resistant Prostate Cancer Cells Identifies Multiple Mechanisms of Therapeutic Resistance
Source: PubMed Central journal article supplement (PMC7998254; doi:10.3390/cancers13061290), 2021-03-14
Supplement: cancers-13-01290-s001.pdf [file cancers-13-01290-s001.pdf]

## **Supplementary Material: Molecular Profiling of Docetaxel-Resistant Prostate Cancer Cells Identifies Multiple Mechanisms of Therapeutic Resistance**

Tiago S. Lima, Diego Iglesias-Gato, Luciano D.O. Souza, Jan Stenvang, Diego S. Lima, Martin A. Röder, Klaus Brasso and José M.A. Moreira

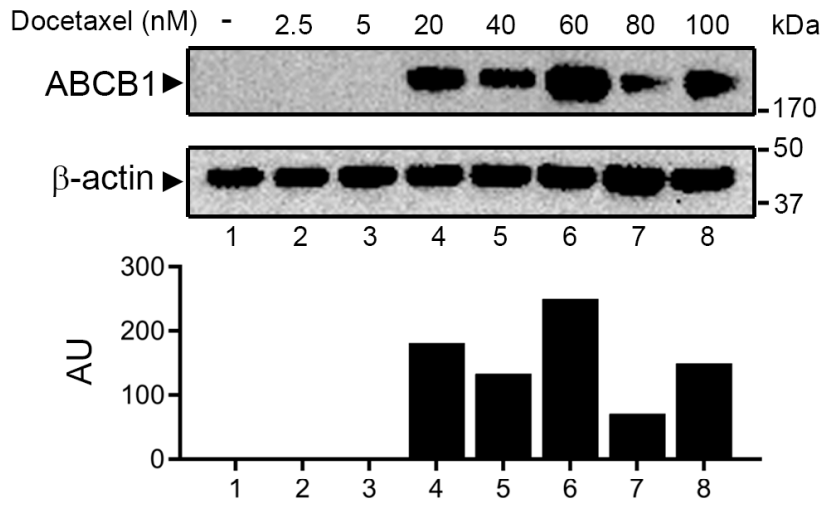

**Fig 5a**

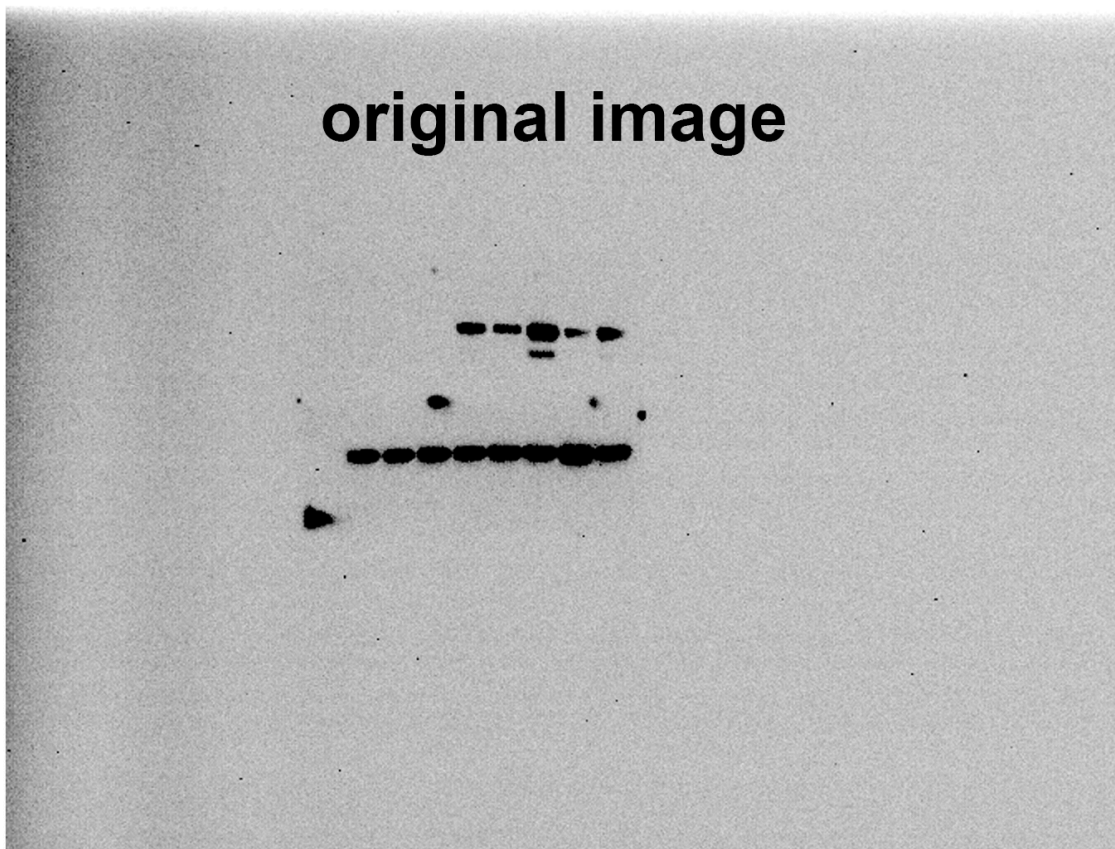

**Figure S1.** Uncropped Western Blot from Figure 5a.

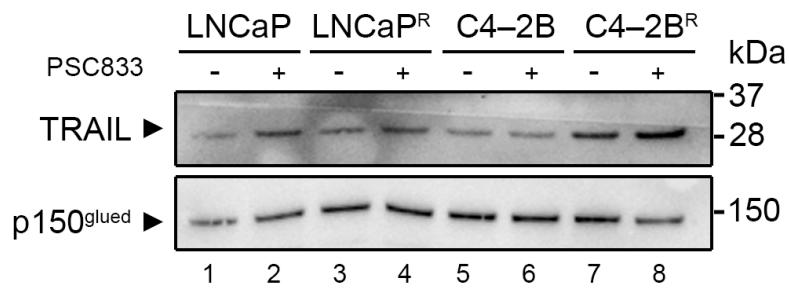

**Fig 6a**

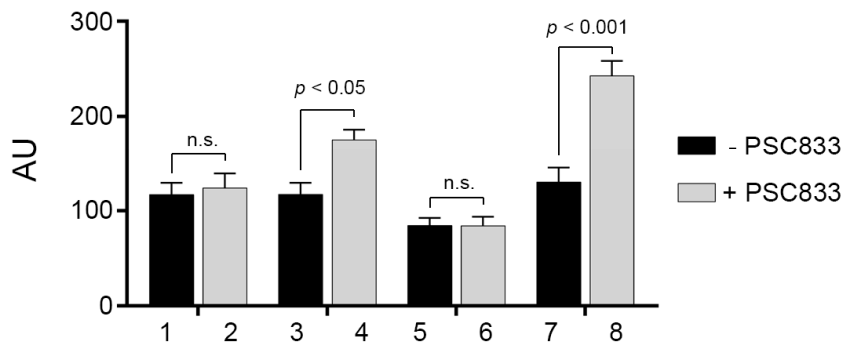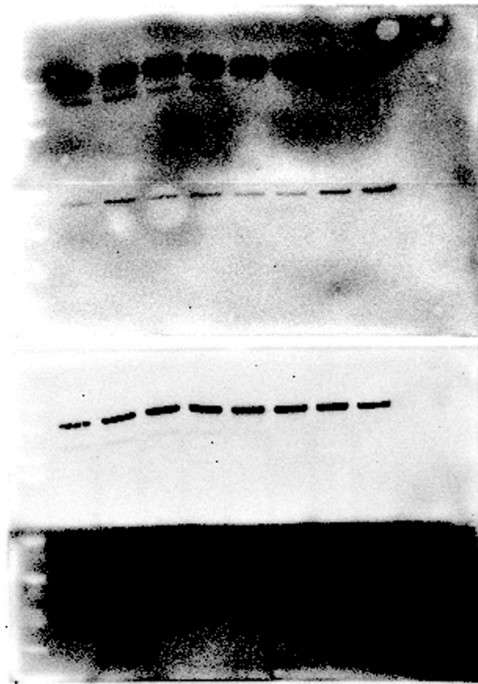

**original images**

**Figure S2.** Uncropped Western Blot from Figure 6a.

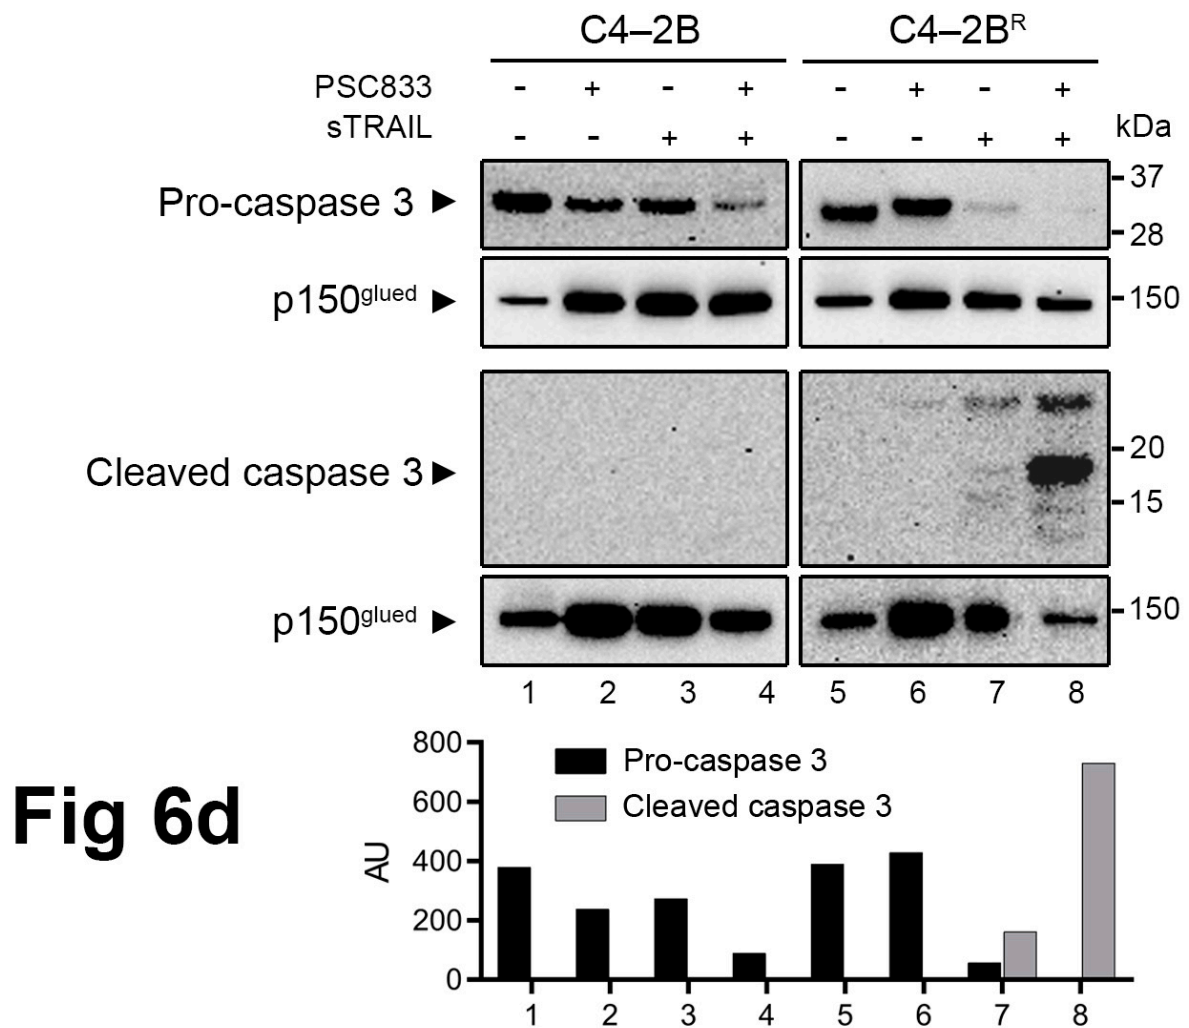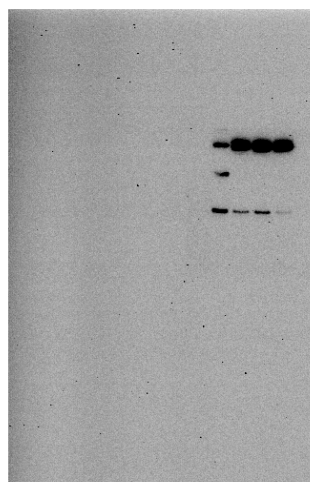

**original images**

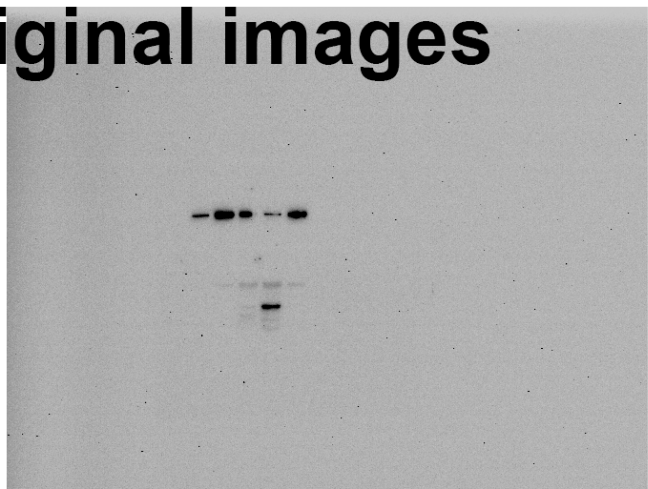

**Figure S3.** Uncropped Western Blot from Figure 6d.

**Table 1.** Significantly deregulated genes found in docetaxel resistant C4-2B<sup>R</sup> cells compared to matched parental C4-2B cells.

| Gene Symbol   | Log2 ratio               | mRNA Accession             | Probe Set ID            |
|---------------|--------------------------|----------------------------|-------------------------|
|               | C42B-R vs. C42B Parental |                            |                         |
| MTCO2P20      | 2.556207                 | ENST00000437339            | TC2200007234.hg.1       |
| sloytar       | 1.8353629                | sloytar.aAug10-unspliced   | TC1500008258.hg.1       |
| FAM46C        | 1.9558613                | NM_017709                  | TC0100009572.hg.1       |
| MT1B          | 3.5956287                | NM_005947                  | TC1600007964.hg.1       |
| VCX2          | 1.8150125                | NM_016378                  | TC0X00009022.hg.1       |
| MYLK          | 2.063236                 | NM_053025                  | TC0300012212.hg.1       |
| TRIM25        | 1.8256367                | NM_005082                  | TC1700011208.hg.1       |
| HYOU1         | 1.9994713                | ENST00000629679            | TSUnmapped00000322.hg.1 |
| PLS1          | 2.0099387                | NM_001145319               | TC0300009033.hg.1       |
| SLC25A40      | 2.2871358                | NM_018843                  | TC0700011710.hg.1       |
| DSTN          | 2.6777968                | NM_001011546               | TC2000006799.hg.1       |
| flubu         | 3.4557462                | flubu.aAug10-unspliced     | TC0100016681.hg.1       |
| WDR44         | 1.7549098                | NM_001184965               | TC0X00008223.hg.1       |
| MEF2C         | 1.6524632                | NM_001131005               | TC0500011418.hg.1       |
| DUX4          | 1.8980595                | NM_001293798               | TC0400012880.hg.1       |
| KCNS3         | 1.9054757                | NM_001282428               | TC0200016408.hg.1       |
| SMARCA2       | 1.8613421                | NM_001289396               | TC0900006473.hg.1       |
| NOS3          | 1.8820606                | NM_000603                  | TC0700009688.hg.1       |
| snorrawby     | 2.5780115                | snorrawby.aAug10-unspliced | TC0600012435.hg.1       |
| FICD          | 2.2886028                | NM_007076                  | TC1200012702.hg.1       |
| C8orf4        | 1.7585952                | NM_020130                  | TC0800007389.hg.1       |
| AL158839.1    | 7.5121217                | uc057hmg.1                 | TC0100014568.hg.1       |
| FKBP14        | 2.336669                 | NM_017946                  | TC0700010621.hg.1       |
| CCNG2         | 1.9747869                | NM_004354                  | TC0400012818.hg.1       |
| swola         | 2.1214652                | swola.aAug10-unspliced     | TC0800011605.hg.1       |
| SH3BGRL2      | 1.8042784                | NM_031469                  | TC0600008622.hg.1       |
| RP11-175I6.1  | 2.4739854                | ENST00000509595            | TC0900010160.hg.1       |
| PLEKHH2       | 2.2555783                | NM_172069                  | TC0200007399.hg.1       |
| VWA5B1        | 2.4121084                | NM_001039500               | TC0100007199.hg.1       |
| SQSTM1        | 2.5798378                | NM_001142298               | TC0500009706.hg.1       |
| HGD           | 2.4191759                | NM_000187                  | TC0300012155.hg.1       |
| HIST1H2BD     | 1.982365                 | NM_021063                  | TC0600007274.hg.1       |
| PACSL1        | 2.1343384                | NM_001184970               | TC2200009357.hg.1       |
| KCNG1         | 2.3609717                | NM_002237                  | TC2000009448.hg.1       |
| PECR          | 1.8237522                | NM_018441                  | TC0200016768.hg.1       |
| spostybu      | 2.5164812                | spostybu.aAug10-unspliced  | TC0500010494.hg.1       |
| CIR1P2        | 1.6461604                | ENST00000514821            | TC0400011658.hg.1       |
| RP1-276J11.2  | 1.873519                 | ENST00000407291            | TC0600009306.hg.1       |
| SLPI          | 4.85093                  | NM_003064                  | TC2000009216.hg.1       |
| snarsmer      | 1.6336102                | snarsmer.aAug10-unspliced  | TC2100008332.hg.1       |
| beyswa        | 2.444127                 | beyswa.aAug10-unspliced    | TC1500010226.hg.1       |
| smarvey       | 2.0148034                | smarvey.aAug10-unspliced   | TC2000009625.hg.1       |
| RP11-467M13.3 | 2.8945584                | ENST00000563361            | TC1600009569.hg.1       |
| HIST1H2AC     | 2.0392265                | NM_003512                  | TC0600007270.hg.1       |
| nawsharby     | 2.0934248                | nawsharby.aAug10-unspliced | TC0500008920.hg.1       |
| EPB41         | 1.8033892                | NM_001166005               | TC0100007574.hg.1       |
| BMP7          | 2.7241943                | NM_001719                  | TC2000009579.hg.1       |
| stawzawby     | 1.9640744                | stawzawby.aAug10-unspliced | TC0800009618.hg.1       |
| USP54         | 2.2468677                | NM_152586                  | TC1000011026.hg.1       |
| CRIP1         | 1.8644994                | NM_014171                  | TC0200007473.hg.1       |
| PHLDA1        | 2.250327                 | NM_007350                  | TC1200011310.hg.1       |

| Gene Symbol  | Log2 ratio               | mRNA Accession              | Probe Set ID            |
|--------------|--------------------------|-----------------------------|-------------------------|
|              | C42B-R vs. C42B Parental |                             |                         |
| TMSB10P2     | 1.9637421                | ENST00000416049             | TC0X00006721.hg.1       |
| ESRP1        | 1.9688116                | NM_001034915                | TC0800008263.hg.1       |
| STK3         | 1.8991319                | NM_001256312                | TC0800011216.hg.1       |
| skoytyby     | 1.9804734                | skoytyby.aAug10-unspliced   | TC0900011615.hg.1       |
| U3           | 2.7957277                | uc060hzu.1                  | TC1700011264.hg.1       |
| beyforbo     | 1.8752613                | beyforbo.aAug10-unspliced   | TC0300012830.hg.1       |
| OR7E108P     | 2.0346537                | OTTHUMT00000469013          | TC0900010741.hg.1       |
| STXBP1       | 1.6425661                | NM_001032221                | TC0900008811.hg.1       |
| NEK11        | 2.1769638                | NM_001146003                | TC0300008826.hg.1       |
| RAB27B       | 2.273912                 | NM_004163                   | TC1800007360.hg.1       |
| MGST1        | 2.129763                 | NM_001260511                | TC1200012597.hg.1       |
| FAM3B        | 2.6562383                | NM_058186                   | TC2100007204.hg.1       |
| FBXW7        | 1.7710307                | NM_001013415                | TC0400012143.hg.1       |
| C10orf113    | 2.31503                  | NM_001010896                | TC1000009985.hg.1       |
| ANKRD30A     | 1.9212155                | NM_052997                   | TC1000007305.hg.1       |
| TCEA1        | 2.4389772                | NM_006756                   | TC0800010458.hg.1       |
| RPL10L       | 1.6362087                | NM_080746                   | TC1400009074.hg.1       |
| SNX24        | 2.4728703                | NM_014035                   | TC0500008483.hg.1       |
| LDOC1        | 3.1814852                | NM_012317                   | TC0X00010989.hg.1       |
| MT1L         | 2.7971764                | NR_001447                   | TC1600007958.hg.1       |
| RNF144B      | 2.8865757                | NM_182757                   | TC0600007108.hg.1       |
| APOL2        | 2.8770442                | NM_030882                   | TC2200008592.hg.1       |
| FAM102A      | 2.5191514                | NM_001035254                | TC0900011613.hg.1       |
| HYOU1        | 2.0172553                | ENST00000630070             | TSUnmapped00000383.hg.1 |
| NUDT4P1      | 2.0543                   | NR_002212                   | TC0100009760.hg.1       |
| NUDT4        | 2.0543                   | BC012069                    | TC0100009833.hg.1       |
| MT2P1        | 2.004661                 | ENST00000262499             | TC0400007731.hg.1       |
| SLC39A8      | 2.430937                 | NM_001135146                | TC0400012949.hg.1       |
| ABCA4        | 1.7557682                | NM_000350                   | TC0100014977.hg.1       |
| AFF1         | 2.1071823                | NM_001166693                | TC0400008053.hg.1       |
| nihayu       | 2.299007                 | nihayu.aAug10-unspliced     | TC0500013134.hg.1       |
| LYPLAL1      | 1.997061                 | NM_001300769                | TC0100018344.hg.1       |
| styloyby     | 2.2864542                | styloyby.aAug10-unspliced   | TC1100012806.hg.1       |
| MT1H         | 2.0951805                | NM_005951                   | TC1600007966.hg.1       |
| charskarbu   | 1.7623106                | charskarbu.aAug10-unspliced | TC0800007359.hg.1       |
| TFRC         | 3.0779295                | NM_001128148                | TC0300013684.hg.1       |
| PBX1         | 2.1003077                | NM_001204961                | TC0100010416.hg.1       |
| C11orf74     | 1.869461                 | NM_001276722                | TC1100007307.hg.1       |
| skoweyby     | 1.9326919                | skoweyby.aAug10-unspliced   | TC0800007025.hg.1       |
| berpu        | 3.4157875                | berpu.aAug10-unspliced      | TC1600009568.hg.1       |
| GAGE2D       | 1.9100043                | NM_001098407                | TC0X00007230.hg.1       |
| AKR1C1       | 3.9698596                | NM_001353                   | TC1000012427.hg.1       |
| SDC4         | 2.9199095                | NM_002999                   | TC2000009218.hg.1       |
| CEBPG        | 2.0440154                | NM_001252296                | TC1900007777.hg.1       |
| ANXA9        | 2.6036305                | NM_003568                   | TC0100009934.hg.1       |
| SLC7A2       | 2.4294286                | NM_001008539                | TC0800006869.hg.1       |
| DPY19L2      | 2.7795074                | NM_173812                   | TC1200011067.hg.1       |
| LNX1         | 1.848864                 | NM_001126328                | TC0400010704.hg.1       |
| RP11-310H4.6 | 1.7799234                | ENST00000432235             | TC0700011150.hg.1       |
| pumeybo      | 2.9632332                | pumeybo.aAug10-unspliced    | TC0200016307.hg.1       |
| barter       | 3.1832414                | barter.aAug10-unspliced     | TC1900008897.hg.1       |
| KIAA1217     | 2.0498295                | NM_001098500                | TC1000007024.hg.1       |
| SCPEP1       | 2.0521278                | NM_021626                   | TC1700008372.hg.1       |
| norome       | 2.8114371                | norome.aAug10-unspliced     | TC0600007272.hg.1       |

| Gene Symbol  | Log2 ratio               | mRNA Accession             | Probe Set ID      |
|--------------|--------------------------|----------------------------|-------------------|
|              | C42B-R vs. C42B Parental |                            |                   |
| GOLPH3L      | 1.9845945                | NM_018178                  | TC0100015747.hg.1 |
| GAGE12C      | 1.6847732                | NM_001098408               | TC0X00007236.hg.1 |
| FIRRE        | 2.36869                  | NR_026975                  | TC0X00010826.hg.1 |
| STOX2        | 2.7031202                | NM_020225                  | TC0400012868.hg.1 |
| TGFB2        | 1.9736983                | NM_001135599               | TC0100011621.hg.1 |
| GFPT1        | 2.057595                 | NM_001244710               | TC0200012956.hg.1 |
| CCSER2       | 2.063996                 | NM_001284240               | TC1000008276.hg.1 |
| PITPNC1      | 2.7577353                | NM_012417                  | TC1700008690.hg.1 |
| TPM4         | 1.8586121                | NM_001145160               | TC1900007260.hg.1 |
| FAM49A       | 2.2904944                | NM_030797                  | TC0200011837.hg.1 |
| UGT2B17      | 3.4642975                | NM_001077                  | TC0400012923.hg.1 |
| IFIH1        | 2.2537599                | NM_022168                  | TC0200014772.hg.1 |
| PRSS3P1      | 2.3051689                | OTTHUMT00000352529         | TC0700013482.hg.1 |
| MIR5087      | 3.0674887                | NR_049810                  | TC0100015651.hg.1 |
| spokabu      | 2.7656844                | spokabu.aAug10-unspliced   | TC0100016834.hg.1 |
| OCLN         | 1.9891542                | NM_001205254               | TC0500007681.hg.1 |
| FTH1P20      | 2.416377                 | ENST00000434913            | TC0200015115.hg.1 |
| LYNX1        | 3.1316922                | NM_023946                  | TC0800012087.hg.1 |
| GIMAP2       | 2.6012378                | NM_015660                  | TC0700009678.hg.1 |
| OGT          | 2.440051                 | NM_181672                  | TC0X00007573.hg.1 |
| BZW1         | 2.2101567                | NM_001207067               | TC0200016591.hg.1 |
| SPATA6       | 2.8650463                | NM_001286238               | TC0100014127.hg.1 |
| ADGRD1       | 1.9458314                | NM_198827                  | TC1200009420.hg.1 |
| NSFL1C       | 1.9769204                | NM_001206736               | TC2000009967.hg.1 |
| HTRA1        | 3.3722675                | NM_002775                  | TC1000009152.hg.1 |
| RYR2         | 2.540142                 | NM_001035                  | TC0100012113.hg.1 |
| PDZRN4       | 2.0251794                | NM_001164595               | TC1200007365.hg.1 |
| TMPRSS13     | 2.5395088                | NM_001077263               | TC1100012460.hg.1 |
| TGIF1        | 2.3427405                | NM_001278682               | TC1800006513.hg.1 |
| CAPN13       | 2.8812177                | NM_144575                  | TC0200012159.hg.1 |
| DDIT3        | 2.8651576                | NM_001195053               | TC1200010968.hg.1 |
| flageyby     | 2.9376454                | flageyby.aAug10-unspliced  | TC0800006607.hg.1 |
| ARHGAP18     | 2.7072875                | NM_033515                  | TC0600013147.hg.1 |
| RP11-42110.3 | 2.433308                 | ENST00000569247            | TC1600010232.hg.1 |
| AHNAK        | 2.3978548                | NM_001620                  | TC1100011083.hg.1 |
| SLC31A1      | 2.3184505                | NM_001859                  | TC0900008483.hg.1 |
| INSIG1       | 2.1990108                | NM_005542                  | TC0700009807.hg.1 |
| ZMAT1        | 2.786966                 | NM_001011657               | TC0X00010375.hg.1 |
| RASSF5       | 2.057347                 | NM_182663                  | TC0100011378.hg.1 |
| CDKL5        | 2.6031282                | NM_001037343               | TC0X00006723.hg.1 |
| SLC6A9       | 2.9733095                | NM_001024845               | TC0100013949.hg.1 |
| NFE2L1       | 1.8720367                | NM_003204                  | TC1700008151.hg.1 |
| APOBEC3F     | 2.2555275                | NM_001006666               | TC2200009273.hg.1 |
| FTH1P1       | 2.5797894                | ENST00000437933            | TC0100007836.hg.1 |
| SLC27A2      | 2.3830538                | NM_001159629               | TC1500007196.hg.1 |
| sporrer      | 2.0543048                | sporrer.aAug10-unspliced   | TC1700010884.hg.1 |
| DNAJB4       | 1.7952117                | NM_007034                  | TC0100018238.hg.1 |
| MOCOS        | 2.0550597                | NM_017947                  | TC1800007092.hg.1 |
| SMAD1        | 1.9369818                | NM_001003688               | TC0400008909.hg.1 |
| blufleyby    | 2.6883414                | blufleyby.aAug10-unspliced | TC0600010924.hg.1 |
| G6PD         | 2.6381767                | NM_000402                  | TC0X00011211.hg.1 |
| COX7B2       | 2.2448897                | NM_130902                  | TC0400010601.hg.1 |
| RNF24        | 2.4011421                | NM_001134337               | TC2000008242.hg.1 |
| NOSTRIN      | 2.720015                 | NM_001171631               | TC0200009902.hg.1 |

| Gene Symbol    | Log2 ratio               | mRNA Accession          | Probe Set ID            |
|----------------|--------------------------|-------------------------|-------------------------|
|                | C42B-R vs. C42B Parental |                         |                         |
| DUSP16         | 2.177465                 | ENST00000629698         | TSUnmapped00000353.hg.1 |
| ARL6IP5        | 2.2438483                | NM_006407               | TC0300007745.hg.1       |
| SERINC2        | 3.0051534                | NM_001199037            | TC0100007638.hg.1       |
| GAS6-AS1       | 2.4923854                | NR_044995               | TC1300010008.hg.1       |
| KGFLP2         | 2.3089495                | NR_003670               | TC0900010077.hg.1       |
| SCD            | 3.149445                 | NM_005063               | TC1000008643.hg.1       |
| CPEB4          | 2.6830664                | NM_001308189            | TC0500009521.hg.1       |
| ZNF716         | 2.8257208                | NM_001159279            | TC0700007692.hg.1       |
| ATXN1          | 3.0712938                | NM_000332               | TC0600010921.hg.1       |
| GBP2           | 3.174421                 | NM_004120               | TC0100018451.hg.1       |
| MCUR1          | 2.685324                 | NM_001031713            | TC0600010867.hg.1       |
| FTH1P3         | 3.7188716                | NR_002201               | TC0200012078.hg.1       |
| BCAT1          | 2.335521                 | NM_001178091            | TC1200010145.hg.1       |
| TGFBR3         | 3.277282                 | NM_001195683            | TC0100014910.hg.1       |
| ANKDD1A        | 2.2231696                | NM_182703               | TC1500010755.hg.1       |
| SC5D           | 3.3064392                | NM_001024956            | TC1100009306.hg.1       |
| HSPB1          | 2.580128                 | NM_001540               | TC0700008090.hg.1       |
| SLC41A2        | 2.5899184                | NM_032148               | TC1200011767.hg.1       |
| TPD52L1        | 2.589391                 | NM_001003395            | TC0600009353.hg.1       |
| MPZL2          | 2.4309084                | NM_005797               | TC1100012474.hg.1       |
| EBAG9          | 1.9143658                | NM_001278938            | TC0800008550.hg.1       |
| PARP14         | 3.007323                 | NM_017554               | TC0300008561.hg.1       |
| PHLDA2         | 3.3740947                | NM_003311               | TC1100009817.hg.1       |
| GAGE2B         | 2.1062987                | NM_001098411            | TC0X00011289.hg.1       |
| TUFT1          | 1.8593719                | NM_001126337            | TC0100009959.hg.1       |
| SESN2          | 3.0843472                | NM_031459               | TC0100007552.hg.1       |
| SPTLC3         | 4.023873                 | NM_018327               | TC2000006736.hg.1       |
| CAST           | 2.2886567                | NM_001042440            | TC0500013204.hg.1       |
| SRD5A3         | 3.0292084                | NM_024592               | TC0400007556.hg.1       |
| MTND2P19       | 1.9594035                | ENST00000449129         | TC0200014466.hg.1       |
| RP11-262H14.11 | 1.9232662                | ENST00000402994         | TC0900007367.hg.1       |
| RANBP9         | 2.251033                 | NM_005493               | TC0600010864.hg.1       |
| RNVU1-14       | 2.1135805                | NR_104075               | TC0100009731.hg.1       |
| CAPN2          | 2.5348122                | NM_001146068            | TC0100011721.hg.1       |
| UGT2B15        | 4.087487                 | NM_001076               | TC0400012924.hg.1       |
| SP140L         | 3.761476                 | NM_001308162            | TC0200011022.hg.1       |
| ANK2           | 3.0075157                | NM_001127493            | TC0400008450.hg.1       |
| NUDT4          | 2.2091818                | NM_001301022            | TC1200008466.hg.1       |
| PRSS3          | 2.397254                 | NM_001197097            | TC0900007006.hg.1       |
| sakaya         | 5.2009363                | sakaya.aAug10-unspliced | TC0600010934.hg.1       |
| CA12           | 3.5536072                | NM_001218               | TC1500009709.hg.1       |
| MAP4           | 2.3073993                | NM_001134364            | TC0300010999.hg.1       |
| RTN3           | 3.4215872                | NM_001265589            | TC1100007906.hg.1       |
| CDH1           | 2.870005                 | NM_004360               | TC1600008209.hg.1       |
| RPL10P5        | 2.1095893                | ENST00000427719         | TC0200013812.hg.1       |
| FTH1P5         | 2.7968874                | ENST00000425761         | TC0600012024.hg.1       |
| SHTN1          | 2.751711                 | NM_001127211            | TC1000011938.hg.1       |
| FYN            | 1.9693853                | NM_002037               | TC0600012875.hg.1       |
| GBA3           | 2.4332054                | NM_001128432            | TC0400007054.hg.1       |
| DIAPH2         | 2.2851849                | NM_006729               | TC0X00007889.hg.1       |
| SEC24D         | 1.9789906                | NM_014822               | TC0400011695.hg.1       |
| CSTA           | 2.761778                 | NM_005213               | TC0300008550.hg.1       |
| TMEM2          | 3.2893984                | NM_001135820            | TC0900010386.hg.1       |
| ZNRF2          | 2.6592278                | NM_147128               | TC0700013343.hg.1       |



| Gene Symbol   | Log2 ratio               | mRNA Accession             | Probe Set ID      |
|---------------|--------------------------|----------------------------|-------------------|
|               | C42B-R vs. C42B Parental |                            |                   |
| HMGCS1        | 2.1856532                | NM_001098272               | TC0500010635.hg.1 |
| MYL6          | 1.9070586                | NM_021019                  | TC1200012648.hg.1 |
| SEMA3C        | 3.134626                 | NM_006379                  | TC0700011626.hg.1 |
| ELOVL6        | 7.713397                 | NM_001130721               | TC0400012956.hg.1 |
| STAT1         | 2.125659                 | NM_007315                  | TC0200015242.hg.1 |
| smeyneeby     | 3.4638515                | smeyneeby.aAug10-unspliced | TC1000006960.hg.1 |
| FGF7P2        | 2.568896                 | OTTHUMT00000157659         | TC2100006546.hg.1 |
| EPHX1         | 2.696237                 | NM_000120                  | TC0100011770.hg.1 |
| GRIN3A        | 2.0824683                | NM_133445                  | TC0900011038.hg.1 |
| garjer        | 6.5080347                | garjer.aAug10-unspliced    | TC1900010559.hg.1 |
| foyjer        | 6.5080347                | foyjer.aAug10-unspliced    | TC1900010557.hg.1 |
| CASP10        | 3.0343173                | NM_001206524               | TC0200010445.hg.1 |
| FKBP1A-SDCBP2 | 4.099933                 | NR_037661                  | TC2000009966.hg.1 |
| FIBIN         | 3.2078543                | NM_203371                  | TC1100007110.hg.1 |
| AMD1          | 2.3803315                | NM_001287214               | TC0600009127.hg.1 |
| CD58          | 3.0199096                | NM_001144822               | TC0100015397.hg.1 |
| tuhiyo        | 2.0951114                | tuhiyo.aAug10-unspliced    | TC0200010130.hg.1 |
| LAMA3         | 2.606424                 | NM_000227                  | TC1800006897.hg.1 |
| MT1X          | 2.7078235                | NM_005952                  | TC1600011399.hg.1 |
| RP11-164A6.1  | 3.8277433                | ENST00000566263            | TC1600007067.hg.1 |
| ADAM22        | 3.3546476                | NM_004194                  | TC0700008265.hg.1 |
| CTAGE5        | 2.3504632                | NM_001247988               | TC1400010605.hg.1 |
| HSPB8         | 5.3794823                | NM_014365                  | TC1200012714.hg.1 |
| SEPHS2        | 1.8761007                | NM_012248                  | TC1600009967.hg.1 |
| CDRT1         | 2.8424735                | NM_001282540               | TC1700012361.hg.1 |
| AGMO          | 5.1053877                | NM_001004320               | TC0700010334.hg.1 |
| SERPINA3      | 3.7901878                | NM_001085                  | TC1400010644.hg.1 |
| GPR1          | 4.6435003                | NM_001098199               | TC0200015514.hg.1 |
| ESYT1         | 3.766751                 | NM_001184796               | TC1200012646.hg.1 |
| TRIM16L       | 2.9274688                | NM_001037330               | TC1700007135.hg.1 |
| MAP1LC3B      | 3.7100227                | NM_022818                  | TC1600011442.hg.1 |
| TBL1X         | 2.7703466                | NM_001139466               | TC0X00006581.hg.1 |
| CDKN1A        | 3.2562292                | NM_000389                  | TC0600007847.hg.1 |
| TLR3          | 2.6054356                | NM_003265                  | TC0400009543.hg.1 |
| MVB12A        | 2.9125915                | NM_001304547               | TC1900007325.hg.1 |
| FBXL2         | 2.5896528                | NM_001171713               | TC0300006994.hg.1 |
| ABCB4         | 2.3626509                | NM_000443                  | TC0700011705.hg.1 |
| TP53INP1      | 2.546145                 | NM_001135733               | TC0800011150.hg.1 |
| VOPP1         | 2.7426176                | NM_001284282               | TC0700011139.hg.1 |
| SH3BGRL       | 3.8019726                | NM_003022                  | TC0X00007744.hg.1 |
| HSPB1P1       | 3.0172966                | ENST00000423240            | TC0900010395.hg.1 |
| CCPG1         | 2.8027964                | NM_001204450               | TC1500010869.hg.1 |
| RCN1          | 2.0356863                | NM_002901                  | TC1100012981.hg.1 |
| MT2A          | 3.3000278                | NM_005953                  | TC1600007957.hg.1 |
| sugorby       | 2.5419974                | sugorby.aAug10-unspliced   | TC0800006629.hg.1 |
| TES           | 2.4288614                | NM_015641                  | TC0700008868.hg.1 |
| CRNDE         | 2.7284465                | NM_001308963               | TC1600010375.hg.1 |
| SLC18B1       | 2.812597                 | NM_052831                  | TC0600013206.hg.1 |
| SYTL2         | 3.361905                 | NM_001162951               | TC1100011833.hg.1 |
| ERAP1         | 2.9046552                | NM_001040458               | TC0500013342.hg.1 |
| ITGAV         | 1.9961687                | NM_001144999               | TC0200010216.hg.1 |
| DEPTOR        | 3.7637937                | NM_001283012               | TC0800008674.hg.1 |
| XAGE1B        | 2.9679797                | NM_001097594               | TC0X00007285.hg.1 |
| BTN3A3        | 2.6942353                | NM_001242803               | TC0600007306.hg.1 |

| Gene Symbol    | Log2 ratio               | mRNA Accession          | Probe Set ID            |
|----------------|--------------------------|-------------------------|-------------------------|
|                | C42B-R vs. C42B Parental |                         |                         |
| NQO1           | 3.478722                 | NM_000903               | TC1600010732.hg.1       |
| EFHC2          | 3.9557226                | NM_025184               | TC0X00009493.hg.1       |
| EGF            | 2.5789373                | NM_001178130            | TC0400008391.hg.1       |
| S100A11        | 3.4654043                | NM_005620               | TC0100015822.hg.1       |
| SVIL           | 2.0556378                | NM_003174               | TC1000010172.hg.1       |
| IYD            | 3.2605581                | NM_001164694            | TC0600009836.hg.1       |
| SORL1          | 3.5583835                | NM_003105               | TC1100009309.hg.1       |
| ITGA6          | 3.3327804                | NM_000210               | TC0200009973.hg.1       |
| GOLIM4         | 2.9543908                | NM_001308155            | TC0300013058.hg.1       |
| COL5A1         | 2.6093705                | NM_000093               | TC0900009127.hg.1       |
| NLRP11         | 5.0331736                | NM_001297743            | TC1900011495.hg.1       |
| NMRK1          | 3.1615076                | NM_001127603            | TC0900010445.hg.1       |
| CD47           | 3.0799217                | NM_001777               | TC0300011936.hg.1       |
| CYP2R1         | 2.9326434                | NM_024514               | TC1100010185.hg.1       |
| FAM3C          | 2.5577636                | NM_001040020            | TC0700012427.hg.1       |
| SEL1L3         | 3.334759                 | NM_001297592            | TC0400010282.hg.1       |
| NBR2           | 2.5912611                | NR_003108               | TC1700007939.hg.1       |
| BTN3A2         | 5.676165                 | NM_001197246            | TC0600007301.hg.1       |
| SCARB2         | 2.6410038                | NM_001204255            | TC0400011057.hg.1       |
| MATN2          | 2.6245186                | NM_002380               | TC0800008324.hg.1       |
| C11orf1        | 2.9532487                | NM_022761               | TC1100009040.hg.1       |
| SLFN5          | 5.592034                 | NM_144975               | TC1700007585.hg.1       |
| SLC9A1         | 2.7157364                | NM_003047               | TC0100013417.hg.1       |
| IDH1           | 2.9535055                | NM_001282386            | TC0200015578.hg.1       |
| TACC1          | 3.6506128                | NM_001122824            | TC0800007351.hg.1       |
| LINC01260      | 5.8145905                | NR_034104               | TC2000009199.hg.1       |
| REXO2          | 4.1899905                | NM_015523               | TC1100013097.hg.1       |
| TXNRD1         | 2.734969                 | NM_001093771            | TC1200008675.hg.1       |
| STX3           | 3.2840781                | NM_001178040            | TC1100013012.hg.1       |
| TRPV6          | 4.233062                 | NM_018646               | TC0700012867.hg.1       |
| CLCN3P1        | 2.7573285                | ENST00000423965         | TC0900012207.hg.1       |
| IFT46          | 3.3162656                | NM_001168618            | TC1100012488.hg.1       |
| skumu          | 6.3857255                | skumu.aAug10-unspliced  | TC1900007926.hg.1       |
| bawvy          | 4.0946937                | bawvy.aAug10-unspliced  | TC1900010558.hg.1       |
| RNF43          | 2.7926848                | NM_001305544            | TC1700012439.hg.1       |
| XAGE1E         | 3.3516333                | NM_001097604            | TC0X00009718.hg.1       |
| muchee         | 4.837899                 | muchee.aAug10-unspliced | TC1900007965.hg.1       |
| stawmo         | 4.837899                 | stawmo.aAug10-unspliced | TC1900007966.hg.1       |
| LMO4           | 4.990986                 | NM_006769               | TC0100008938.hg.1       |
| TRAF5          | 2.2844217                | NM_001033910            | TC0100011487.hg.1       |
| PIGA           | 2.6435392                | NM_002641               | TC0X00009124.hg.1       |
| SLC5A1         | 7.196634                 | NM_000343               | TC2200007120.hg.1       |
| SOHLH2         | 5.655156                 | NM_001282147            | TC1300010032.hg.1       |
| ATP2B1         | 4.5906506                | NM_001001323            | TC1200011474.hg.1       |
| MSMO1          | 3.3272045                | NM_001017369            | TC0400009221.hg.1       |
| AGR2           | 7.5411777                | NM_006408               | TC0700010355.hg.1       |
| CCDC169-SOHLH2 | 4.812886                 | NM_001198910            | TC1300010031.hg.1       |
| ARHGEF2        | 4.1870937                | NM_001162383            | TC0100018507.hg.1       |
| CDK19          | 2.6237354                | NM_001300960            | TC0600012839.hg.1       |
| SLC16A1        | 4.5411086                | ENST00000629508         | TSUnmapped00000372.hg.1 |
| IFRD1          | 2.8767796                | NM_001007245            | TC0700013441.hg.1       |
| IRF6           | 3.238593                 | NM_001206696            | TC0100017172.hg.1       |
| NPC1           | 2.7375877                | NM_000271               | TC1800008285.hg.1       |
| ENAH           | 3.6579103                | NM_001008493            | TC0100017491.hg.1       |

| Gene Symbol | Log2 ratio               | mRNA Accession             | Probe Set ID            |
|-------------|--------------------------|----------------------------|-------------------------|
|             | C42B-R vs. C42B Parental |                            |                         |
| RTN4        | 4.4425783                | NM_007008                  | TC0200016672.hg.1       |
| SDC2        | 2.9694257                | NM_002998                  | TC0800008299.hg.1       |
| NAALADL2    | 5.1968737                | NM_207015                  | TC0300013904.hg.1       |
| CA1         | 6.0031576                | NM_001128829               | TC0800010990.hg.1       |
| SLC16A1     | 6.8362164                | ENST00000629920            | TSUnmapped00000370.hg.1 |
| ATF3        | 6.918365                 | NM_001030287               | TC0100011533.hg.1       |
| GCNT3       | 7.1341777                | NM_004751                  | TC1500007409.hg.1       |
| SLC16A1     | 4.7119775                | ENST00000628110            | TSUnmapped00000474.hg.1 |
| TNFSF15     | 8.423518                 | NM_001204344               | TC0900011300.hg.1       |
| IL1RN       | 3.9677577                | NM_000577                  | TC0200016511.hg.1       |
| SERPIN1     | 6.7106404                | NM_001122752               | TC0300009412.hg.1       |
| PRKAR2B     | 2.997872                 | NM_002736                  | TC0700008745.hg.1       |
| FDFT1       | 3.5051198                | NM_001287742               | TC0800006760.hg.1       |
| SAGE1       | 3.769296                 | NM_018666                  | TC0X00008518.hg.1       |
| CCR2        | 4.198822                 | NM_001123041               | TC0300007256.hg.1       |
| JUN         | 6.7944                   | NM_002228                  | TC0100014349.hg.1       |
| TMEM154     | 5.604867                 | NM_152680                  | TC0400012150.hg.1       |
| MFSD6       | 5.952086                 | NM_017694                  | TC0200010264.hg.1       |
| MANBA       | 5.6267633                | NM_005908                  | TC0400011464.hg.1       |
| C1orf158    | 13.972065                | NM_152290                  | TC0100006905.hg.1       |
| XG          | 8.097232                 | NM_001141919               | TC0X00006480.hg.1       |
| PAX9        | 3.197338                 | NM_006194                  | TC1400006933.hg.1       |
| KIAA1841    | 5.085828                 | NM_001129993               | TC0200016454.hg.1       |
| FTH1P7      | 3.222549                 | ENST00000450676            | TC1300008309.hg.1       |
| glormu      | 12.776982                | glormu.aAug10-unspliced    | TC1900007923.hg.1       |
| blymu       | 12.776982                | blymu.aAug10-unspliced     | TC1900007920.hg.1       |
| blermu      | 12.776982                | blermu.aAug10-unspliced    | TC1900007919.hg.1       |
| pleemu      | 12.776982                | pleemu.aAug10-unspliced    | TC1900007929.hg.1       |
| glumu       | 12.776982                | glumu.aAug10-unspliced     | TC1900007924.hg.1       |
| plumu       | 12.776982                | plumu.aAug10-unspliced     | TC1900007930.hg.1       |
| FKBP1A      | 3.864848                 | NM_000801                  | TC2000009965.hg.1       |
| FTH1P8      | 4.889244                 | ENST00000498161            | TC0X00008672.hg.1       |
| ISCU        | 3.1932976                | NM_001301140               | TC1200008771.hg.1       |
| GPNMB       | 4.448002                 | NM_001005340               | TC0700006913.hg.1       |
| IFI16       | 6.2759724                | NM_001206567               | TC0100010244.hg.1       |
| rekimu      | 11.182986                | rekimu.aAug10-unspliced    | TC0700011707.hg.1       |
| swoyneeby   | 5.683965                 | swoyneeby.aAug10-unspliced | TC1000009987.hg.1       |
| PRSS1       | 8.865776                 | ENST00000311737            | TC0700013481.hg.1       |
| LPIN1       | 3.8061435                | NM_001261427               | TC0200016403.hg.1       |
| TMEM123     | 4.1524496                | NM_052932                  | TC1100012121.hg.1       |
| CT45A9      | 12.90071                 | NM_001291540               | TC0X00010918.hg.1       |
| CT45A8      | 12.90071                 | NM_001291535               | TC0X00010917.hg.1       |
| QKI         | 4.03818                  | NM_001301085               | TC0600010121.hg.1       |
| FAM129A     | 5.8426924                | NM_052966                  | TC0100016678.hg.1       |
| machee      | 12.880194                | machee.aAug10-unspliced    | TC1900010561.hg.1       |
| choserbu    | 15.196476                | choserbu.aAug10-unspliced  | TC1900007921.hg.1       |
| klarmu      | 15.196476                | klarmu.aAug10-unspliced    | TC1900007925.hg.1       |
| slumu       | 15.196476                | slumu.aAug10-unspliced     | TC1900007931.hg.1       |
| narva       | 15.196476                | narva.aAug10-unspliced     | TC1900007927.hg.1       |
| CT45A1      | 6.4254484                | NM_001017417               | TC0X00008516.hg.1       |
| BCAP29      | 4.129672                 | NM_001008405               | TC0700013439.hg.1       |
| GCLM        | 5.316095                 | NM_001308253               | TC0100014966.hg.1       |
| kawjer      | 17.038025                | kawjer.aAug10-unspliced    | TC1900010563.hg.1       |
| rawsarbo    | 17.038025                | rawsarbo.aAug10-unspliced  | TC1900010556.hg.1       |

| Gene Symbol   | Log2 ratio               | mRNA Accession           | Probe Set ID      |
|---------------|--------------------------|--------------------------|-------------------|
|               | C42B-R vs. C42B Parental |                          |                   |
| geyjer        | 17.038025                | geyjer.aAug10-unspliced  | TC1900010560.hg.1 |
| kajer         | 17.038025                | kajer.aAug10-unspliced   | TC1900010562.hg.1 |
| CLCN3         | 4.78516                  | NM_001243372             | TC0400009284.hg.1 |
| UNC13C        | 6.261909                 | NM_001080534             | TC1500007294.hg.1 |
| P4HA2         | 4.6525226                | NM_001017973             | TC0500013354.hg.1 |
| CT45A10       | 13,91298                 | NM_001291527             | TC0X00010919.hg.1 |
| ERICH2        | 6.9932623                | NM_001289947             | TC0200009933.hg.1 |
| LAMP3         | 21.869093                | NM_014398                | TC0300013336.hg.1 |
| CT45A2        | 11.4338665               | NM_152582                | TC0X00010915.hg.1 |
| CASP8         | 5.102216                 | NM_001080124             | TC0200010447.hg.1 |
| CT45A6        | 7.2247996                | NM_001017438             | TC0X00010916.hg.1 |
| neeva         | 20.764526                | neeva.aAug10-unspliced   | TC1900007928.hg.1 |
| HEXB          | 4.197721                 | NM_000521                | TC0500007792.hg.1 |
| CLDN12        | 4.0508637                | NM_001185072             | TC0700013396.hg.1 |
| glermu        | 18,37179                 | glermu.aAug10-unspliced  | TC1900007922.hg.1 |
| CDR1          | 21.426937                | NM_004065                | TC0X00010982.hg.1 |
| TSPAN7        | 5.3132873                | NM_004615                | TC0X00011279.hg.1 |
| CASP4         | 10.432205                | NM_001225                | TC1100012165.hg.1 |
| CT45A5        | 8.474921                 | NM_001007551             | TC0X00010912.hg.1 |
| PLA2G2A       | 17.562618                | NM_000300                | TC0100013162.hg.1 |
| BHLHE41       | 6.6517124                | NM_030762                | TC1200010182.hg.1 |
| GNAT3         | 8.211151                 | NM_001102386             | TC0700011624.hg.1 |
| BST2          | 18.39729                 | NM_004335                | TC1900009970.hg.1 |
| GNAI1         | 7.716185                 | NM_001256414             | TC0700008181.hg.1 |
| CT45A3        | 8.514448                 | NM_001017435             | TC0X00010910.hg.1 |
| ENTPD3        | 8.324273                 | NM_001248                | TC0300007117.hg.1 |
| ALDH3A2       | 7.4829698                | NM_000382                | TC1700007189.hg.1 |
| PPIC          | 4.463586                 | NM_000943                | TC0500011875.hg.1 |
| GTPBP2        | 7.0732126                | NM_001286216             | TC0600011880.hg.1 |
| stawvee       | 22,592394                | stawvee.aAug10-unspliced | TC2100007844.hg.1 |
| ID2           | 7.4938555                | NM_002166                | TC0200006627.hg.1 |
| ENC1          | 7.352578                 | NM_001256574             | TC0500011146.hg.1 |
| CT45A7        | 9.232579                 | NM_001291543             | TC0X00010914.hg.1 |
| SLC16A1       | 10.68156                 | NM_001166496             | TC0100015310.hg.1 |
| ME1           | 5.6458917                | NM_002395                | TC0600012434.hg.1 |
| SDCBP2        | 15.830707                | NM_001199784             | TC2000009964.hg.1 |
| PTPDC1        | 7.2160754                | NM_001253829             | TC0900008010.hg.1 |
| GABARAPL1     | 11,915585                | NM_031412                | TC1200006787.hg.1 |
| IGFBP3        | 65.72888                 | NM_000598                | TC0700010965.hg.1 |
| VTRNA1-2      | 20.80613                 | NR_026704                | TC0500008868.hg.1 |
| ABCB1         | 20,164732                | NM_000927                | TC0700011706.hg.1 |
| CLU           | 30.658182                | NM_001831                | TC0800009961.hg.1 |
| MBNL2         | 29.695538                | NM_001306070             | TC1300007774.hg.1 |
| VTRNA1-1      | 139.27454                | NR_026703                | TC0500008867.hg.1 |
| TM4SF1        | 41.006676                | NM_014220                | TC0300012773.hg.1 |
| RUNDC3B       | 107,40425                | NM_001134405             | TC0700008261.hg.1 |
| AMACR         | 0.059065506              | NM_001167595             | TC0500013297.hg.1 |
| C1QTNF3-AMACR | 0.063421085              | NR_037951                | TC0500013296.hg.1 |
| NCAM2         | 0.015936414              | NM_004540                | TC2100006714.hg.1 |
| PRAC1         | 0.17386907               | NM_032391                | TC1700011002.hg.1 |
| TNFRSF19      | 0.0226596                | NM_001204458             | TC1300006594.hg.1 |
| COLCA1        | 0.05934625               | NM_001302644             | TC1100012285.hg.1 |
| COL12A1       | 0.049540885              | NM_004370                | TC0600012314.hg.1 |
| HMG2P46       | 0.106946535              | NR_022014                | TC1500010735.hg.1 |

| Gene Symbol    | Log2 ratio               | mRNA Accession              | Probe Set ID      |
|----------------|--------------------------|-----------------------------|-------------------|
|                | C42B-R vs. C42B Parental |                             |                   |
| EIF1AY         | 0.06992707               | NM_001278612                | TC0Y00006730.hg.1 |
| NETO1          | 0.06653976               | NM_001201465                | TC1800009011.hg.1 |
| SSFA2          | 0.061340563              | NM_001130445                | TC0200010164.hg.1 |
| soypoy         | 0.08891609               | soypoy.aAug10-unspliced     | TC1500008487.hg.1 |
| USP9Y          | 0.07599683               | NM_004654                   | TC0Y00006629.hg.1 |
| LIN7A          | 0.09255946               | NM_004664                   | TC1200011385.hg.1 |
| DDX3Y          | 0.036294784              | NM_001122665                | TC0Y00006632.hg.1 |
| EPHA6          | 0.057879977              | NM_001080448                | TC0300008082.hg.1 |
| SLC30A4        | 0.045821954              | NM_013309                   | TC1500009298.hg.1 |
| NOVA1          | 0.1565771                | NM_002515                   | TC1400008780.hg.1 |
| ELOVL7         | 0.049077235              | NM_001104558                | TC0500010869.hg.1 |
| ABCC4          | 0.07541325               | NM_001105515                | TC1300009505.hg.1 |
| CHPT1          | 0.118322596              | NM_020244                   | TC1200012698.hg.1 |
| GPR158         | 0.11042797               | NM_020752                   | TC1000007061.hg.1 |
| PVRL3          | 0.10431223               | NM_001243286                | TC0300008316.hg.1 |
| IGF1R          | 0.03335627               | NM_000875                   | TC1500008485.hg.1 |
| snarlyby       | 0.12991005               | snarlyby.aAug10-unspliced   | TC1500008499.hg.1 |
| RPS4Y1         | 0.02991805               | NM_001008                   | TC0Y00007322.hg.1 |
| MIPEP          | 0.13367724               | NM_005932                   | TC1300008338.hg.1 |
| SYCP3          | 0.20759073               | NM_001177948                | TC1200011710.hg.1 |
| tupoy          | 0.23465252               | tupoy.aAug10-unspliced      | TC1500010596.hg.1 |
| FAM198B        | 0.0953856                | NM_001031700                | TC0400012245.hg.1 |
| MANEA          | 0.13947152               | NM_024641                   | TC0600008863.hg.1 |
| skersworby     | 0.06479586               | skersworby.aAug10-unspliced | TC0300008083.hg.1 |
| NBEAP1         | 0.17064168               | NR_027992                   | TC1500008627.hg.1 |
| TENM1          | 0.13144097               | NM_001163278                | TC0X00010734.hg.1 |
| SLC45A3        | 0.054192107              | NM_033102                   | TC0100017073.hg.1 |
| KCNN2          | 0.100247286              | NM_001278204                | TC0500008356.hg.1 |
| SMAD5-AS1_2    | 0.12412887               | ENST00000625970             | TC0X00010737.hg.1 |
| GCNT1          | 0.12824103               | NM_001097633                | TC0900012141.hg.1 |
| DLGAP5         | 0.13707192               | NM_001146015                | TC1400009248.hg.1 |
| ODC1           | 0.24383058               | NM_001287188                | TC0200011720.hg.1 |
| slorzu         | 0.07500562               | slorzu.aAug10-unspliced     | TC1500007124.hg.1 |
| MPC2           | 0.2423454                | NM_001143674                | TC0100016318.hg.1 |
| FXD3           | 0.11792929               | NM_001136007                | TC1900007836.hg.1 |
| PLK1           | 0.1562279                | NM_005030                   | TC1600007235.hg.1 |
| RP11-1084J3.1  | 0.14328061               | ENST00000504847             | TC0500007098.hg.1 |
| HMG2P46        | 0.12467633               | ENST00000568669             | TC1500007126.hg.1 |
| RP11-312J18.5  | 0.2535122                | ENST00000425270             | TC0100010319.hg.1 |
| MICAL1         | 0.19511811               | NM_001159291                | TC0600014333.hg.1 |
| FAM162A        | 0.24056706               | NM_014367                   | TC0300008551.hg.1 |
| RP11-566K19.8  | 0.15390322               | ENST00000616872             | TC1500006504.hg.1 |
| SGK3           | 0.3514962                | NM_013257                   | TC0800012312.hg.1 |
| spawma         | 0.045882825              | spawma.aAug10-unspliced     | TC2100006717.hg.1 |
| GRB10          | 0.1746415                | NM_001001549                | TC0700011054.hg.1 |
| ARG2           | 0.13277169               | NM_001172                   | TC1400007500.hg.1 |
| PNMA1          | 0.12000802               | NM_006029                   | TC1400009668.hg.1 |
| NUSAP1         | 0.18117537               | NM_001243142                | TC1500006999.hg.1 |
| RHOU           | 0.21054453               | NM_021205                   | TC0100018355.hg.1 |
| PRMT6          | 0.27755216               | NM_018137                   | TC0100009305.hg.1 |
| RP11-467L19.11 | 0.22862989               | ENST00000553844             | TC1500008624.hg.1 |
| SACS           | 0.16955183               | NM_001278055                | TC1300008329.hg.1 |
| ELK4           | 0.20709777               | NM_001973                   | TC0100017072.hg.1 |
| PLK2           | 0.17837898               | NM_001252226                | TC0500010835.hg.1 |

| Gene Symbol  | Log2 ratio               | mRNA Accession            | Probe Set ID            |
|--------------|--------------------------|---------------------------|-------------------------|
|              | C42B-R vs. C42B Parental |                           |                         |
| CKB          | 0.1957353                | NM_001823                 | TC1400010317.hg.1       |
| RBM24        | 0.25934535               | NM_001143941              | TC0600007084.hg.1       |
| FAM105A      | 0.15613861               | NM_019018                 | TC0500006816.hg.1       |
| bloteeby     | 0.2365744                | bloteeby.aAug10-unspliced | TC0900010471.hg.1       |
| DUSP4        | 0.11050549               | NM_001394                 | TC0800010002.hg.1       |
| PLEKHH1      | 0.13054936               | NM_020715                 | TC1400007495.hg.1       |
| BLOC1S6      | 0.21769437               | NM_001311255              | TC1500010736.hg.1       |
| FANCI        | 0.23741315               | NM_001113378              | TC1500008252.hg.1       |
| PMEPA1       | 0.11039992               | NM_001255976              | TC2000009604.hg.1       |
| FAM83D       | 0.15709096               | NM_030919                 | TC2000007341.hg.1       |
| DLX1         | 0.2682124                | NM_001038493              | TC0200009967.hg.1       |
| RBM3         | 0.15596639               | NM_006743                 | TC0X00007195.hg.1       |
| SPDEF        | 0.18106687               | NM_001252294              | TC0600011590.hg.1       |
| CDK1         | 0.15799786               | NM_001170406              | TC1000007748.hg.1       |
| KIF14        | 0.24324186               | NM_001305792              | TC0100016891.hg.1       |
| AADAT        | 0.15300687               | NM_001286682              | TC0400012396.hg.1       |
| UAP1         | 0.31822258               | NM_003115                 | TC0100010381.hg.1       |
| MIPOL1       | 0.2759439                | NM_001195296              | TC1400006943.hg.1       |
| GNPNAT1      | 0.23473144               | NM_198066                 | TC1400009190.hg.1       |
| bawver       | 0.17049104               | bawver.aAug10-unspliced   | TC2000009606.hg.1       |
| CCNA2        | 0.37050804               | NM_001237                 | TC0400011748.hg.1       |
| TOP2A        | 0.1720557                | NM_001067                 | TC1700010618.hg.1       |
| LRIG1        | 0.11914799               | ENST00000631853           | TSUnmapped00000527.hg.1 |
| DSG2         | 0.18742837               | NM_001943                 | TC1800007014.hg.1       |
| UBE2E3       | 0.30076867               | NM_001278554              | TC0200010152.hg.1       |
| lerchar      | 0.2866356                | lerchar.aAug10-unspliced  | TC1200011312.hg.1       |
| HNRNPF       | 0.35788873               | NM_001098204              | TC1000010438.hg.1       |
| LEO1         | 0.32642314               | NM_001286430              | TC1500009446.hg.1       |
| NUP58        | 0.2296493                | NM_001008564              | TC1300006641.hg.1       |
| CCNB2        | 0.12473247               | NM_004701                 | TC1500007392.hg.1       |
| MCTP2        | 0.20682152               | NM_001159643              | TC1500010792.hg.1       |
| C1QTNF9B-AS1 | 0.27327463               | NM_001014442              | TC1300006599.hg.1       |
| PDS5B        | 0.3102115                | NM_015032                 | TC1300006810.hg.1       |
| EFNA5        | 0.18636826               | NM_001962                 | TC0500011648.hg.1       |
| CDKN3        | 0.2098086                | NM_001130851              | TC1400007201.hg.1       |
| CENPU        | 0.25246412               | NM_024629                 | TC0400012620.hg.1       |
| FAM214A      | 0.25739858               | NM_001286495              | TC1500009460.hg.1       |
| MBOAT2       | 0.22546573               | NM_138799                 | TC0200016626.hg.1       |
| MMP16        | 0.15111978               | NM_005941                 | TC0800011041.hg.1       |
| DEGS1        | 0.27528557               | NM_003676                 | TC0100011736.hg.1       |
| HSBP1L1      | 0.23926227               | NM_001136180              | TC1800007829.hg.1       |
| RFC3         | 0.29012954               | NM_002915                 | TC1300006847.hg.1       |
| KCNH8        | 0.18288943               | NM_144633                 | TC0300006781.hg.1       |
| HOMER2       | 0.31101528               | NM_004839                 | TC1500010251.hg.1       |
| ST7          | 0.23107894               | NM_018412                 | TC0700008882.hg.1       |
| FKBP5        | 0.18159579               | NM_001145775              | TC0600011635.hg.1       |
| ARHGAP11A    | 0.2558602                | ENST00000633634           | TSUnmapped00000695.hg.1 |
| TSTA3        | 0.24702784               | NM_003313                 | TC0800012147.hg.1       |
| TOX3         | 0.26068604               | NM_001080430              | TC1600010316.hg.1       |
| RP11-32B5.2  | 0.28276327               | ENST00000555285           | TC1500008647.hg.1       |
| KIF2C        | 0.1590539                | NM_001297655              | TC0100008101.hg.1       |
| OSBPL8       | 0.2552854                | NM_001003712              | TC1200011321.hg.1       |
| SETBP1       | 0.27496424               | NM_001130110              | TC1800007186.hg.1       |
| DEPDC1       | 0.24050532               | NM_001114120              | TC0100014543.hg.1       |

| Gene Symbol | Log2 ratio               | mRNA Accession             | Probe Set ID      |
|-------------|--------------------------|----------------------------|-------------------|
|             | C42B-R vs. C42B Parental |                            |                   |
| LGALS8      | 0.32247704               | NM_006499                  | TC0100012097.hg.1 |
| PRC1        | 0.1779887                | NM_001267580               | TC1500010463.hg.1 |
| OGDH        | 0.38713583               | NM_001003941               | TC0700007392.hg.1 |
| TTK         | 0.20442137               | NM_001166691               | TC0600008630.hg.1 |
| ALDH1A3     | 0.4241392                | NM_000693                  | TC1500010800.hg.1 |
| SMARCD2     | 0.28894892               | NM_001098426               | TC1700011424.hg.1 |
| glaskaw     | 0.20407212               | glaskaw.aAug10-unspliced   | TC1500008488.hg.1 |
| NRIP1       | 0.18133456               | NM_003489                  | TC2100008545.hg.1 |
| FAM135A     | 0.36547872               | NM_001105531               | TC0600008468.hg.1 |
| NDC80       | 0.1921163                | NM_006101                  | TC1800006484.hg.1 |
| SMC4        | 0.31495026               | NM_001002800               | TC0300009337.hg.1 |
| NLGN4Y      | 0.22973306               | NM_001164238               | TC0Y00006651.hg.1 |
| mureha      | 0.20594318               | mureha.aAug10-unspliced    | TC0100009308.hg.1 |
| snorgoyby   | 0.3110182                | snorgoyby.aAug10-unspliced | TC1200009073.hg.1 |
| torpoy      | 0.16098881               | torpoy.aAug10-unspliced    | TC1500008495.hg.1 |
| SLC39A10    | 0.36415023               | NM_001127257               | TC0200010328.hg.1 |
| CALML4      | 0.30009294               | NM_001031733               | TC1500010886.hg.1 |
| ZMIZ1       | 0.22366098               | NM_020338                  | TC1000008182.hg.1 |
| RWDD2A      | 0.24993981               | NM_033411                  | TC0600008665.hg.1 |
| ACLY        | 0.3235301                | NM_001096                  | TC1700010693.hg.1 |
| CENPF       | 0.15672778               | NM_016343                  | TC0100011581.hg.1 |
| PBK         | 0.3631735                | NM_001278945               | TC0800009970.hg.1 |
| FECH        | 0.3086865                | NM_000140                  | TC1800008776.hg.1 |
| TMPRSS2     | 0.21594428               | NM_001135099               | TC2100008568.hg.1 |
| RASSF3      | 0.21108563               | NM_178169                  | TC1200008005.hg.1 |
| TJP1        | 0.32519495               | NM_001301026               | TC1500008840.hg.1 |
| STRN3       | 0.4758815                | NM_001083893               | TC1400008838.hg.1 |
| topoy       | 0.13980052               | topoy.aAug10-unspliced     | TC1500010597.hg.1 |
| CPNE3       | 0.29288474               | NM_003909                  | TC0800008150.hg.1 |
| EIF2S1      | 0.36441037               | NM_004094                  | TC1400007494.hg.1 |
| MKI67       | 0.16814242               | NM_001145966               | TC1000012235.hg.1 |
| ACOT2       | 0.25482523               | NM_006821                  | TC1400007647.hg.1 |
| gyby        | 0.17672156               | gyby.aAug10-unspliced      | TC0Y00007075.hg.1 |
| RSL24D1     | 0.45835865               | NM_016304                  | TC1500009492.hg.1 |
| CENPN       | 0.3301477                | NM_001100624               | TC1600008567.hg.1 |
| CANX        | 0.25026622               | NM_001024649               | TC0500009700.hg.1 |
| PRUNE2      | 0.17583582               | NM_001308047               | TC0900010470.hg.1 |
| FLVCR1      | 0.38105702               | NM_014053                  | TC0100011549.hg.1 |
| SNORD108    | 0.31748018               | NR_001292                  | TC1500006569.hg.1 |
| PTTG1       | 0.27127957               | NM_001282382               | TC0500009281.hg.1 |
| gawflubu    | 0.26713425               | gawflubu.aAug10-unspliced  | TC1200008010.hg.1 |
| NOP56       | 0.43659714               | NM_006392                  | TC2000006518.hg.1 |
| RAB27A      | 0.34300104               | NM_004580                  | TC1500010866.hg.1 |
| SORD2P      | 0.2979169                | ENST00000558556            | TC1500009271.hg.1 |
| CREB3L4     | 0.21225657               | NM_001255978               | TC0100010058.hg.1 |
| PRR11       | 0.31903467               | NM_018304                  | TC1700012285.hg.1 |
| skawvybu    | 0.34753427               | skawvybu.aAug10-unspliced  | TC1700009030.hg.1 |
| IL1R1       | 0.29786736               | NM_000877                  | TC0200008666.hg.1 |
| BUD13P1     | 0.327071                 | ENST00000603676            | TC1100008833.hg.1 |
| PTGFR       | 0.21314067               | NM_000959                  | TC0100008812.hg.1 |
| weysperby   | 0.18594058               | weysperby.aAug10-unspliced | TC0400006510.hg.1 |
| CORO1B      | 0.3642342                | NM_001018070               | TC1100013194.hg.1 |
| ENOX1       | 0.4679353                | NM_001127615               | TC1300008766.hg.1 |
| BDP1        | 0.23886979               | NM_018429                  | TC0500007725.hg.1 |

| Gene Symbol | Log2 ratio               | mRNA Accession            | Probe Set ID      |
|-------------|--------------------------|---------------------------|-------------------|
|             | C42B-R vs. C42B Parental |                           |                   |
| GREB1       | 0.16320696               | NM_014668                 | TC0200006725.hg.1 |
| ASPM        | 0.21743447               | NM_001206846              | TC0100016831.hg.1 |
| SPRY1       | 0.2334271                | NM_001258038              | TC0400008628.hg.1 |
| snasney     | 0.25396127               | snasney.aAug10-unspliced  | TC1600011281.hg.1 |
| ATP8A2      | 0.1917579                | NM_016529                 | TC1300006643.hg.1 |
| RAB3B       | 0.35519183               | NM_002867                 | TC0100014191.hg.1 |
| SNRPGP14    | 0.41755953               | ENST00000435400           | TC1300007166.hg.1 |
| chysloby    | 0.2265794                | chysloby.aAug10-unspliced | TC0500011649.hg.1 |
| zarta       | 0.29425803               | zarta.aAug10-unspliced    | TC2100007211.hg.1 |
| CAMKK2      | 0.1714699                | NM_001270485              | TC1200012199.hg.1 |
| PARP1       | 0.35054034               | NM_001618                 | TC0100017528.hg.1 |
| snervobo    | 0.17004317               | snervobo.aAug10-unspliced | TC0400008186.hg.1 |
| ATAD2       | 0.22080632               | NM_014109                 | TC0800011679.hg.1 |
| weyta       | 0.26925874               | weyta.aAug10-unspliced    | TC2100008208.hg.1 |
| SMS         | 0.2649469                | NM_001258423              | TC0X00006770.hg.1 |
| MALT1       | 0.36564657               | NM_006785                 | TC1800007431.hg.1 |
| SLC44A4     | 0.19461238               | ENST00000229729           | TC0600011464.hg.1 |
| GLUD1P3     | 0.35461098               | NR_048575                 | TC1000008044.hg.1 |
| jorsubu     | 0.3946707                | jorsubu.aAug10-unspliced  | TC2000007999.hg.1 |
| FAM8A1      | 0.3006653                | NM_016255                 | TC0600007092.hg.1 |
| BCL6        | 0.36069652               | NM_001130845              | TC0300013471.hg.1 |
| HOXB13      | 0.35708195               | NM_006361                 | TC1700011004.hg.1 |
| NPEPPS      | 0.37399438               | NM_006310                 | TC1700008128.hg.1 |
| PDE10A      | 0.36599797               | NM_001130690              | TC0600014366.hg.1 |
| HIST1H1B    | 0.24172328               | NM_005322                 | TC0600011232.hg.1 |
| ADAMTS1     | 0.29155067               | NM_006988                 | TC2100007821.hg.1 |
| UTRN        | 0.2289929                | NM_007124                 | TC0600009712.hg.1 |
| lorby       | 0.17849019               | lorby.aAug10-unspliced    | TC0Y00007076.hg.1 |
| TXLNGY      | 0.24385932               | NR_045128                 | TC0Y00006722.hg.1 |
| THBS1       | 0.29709524               | NM_003246                 | TC1500006925.hg.1 |
| KLK2        | 0.36345062               | NM_001002231              | TC1900008608.hg.1 |
| TXNRD2      | 0.2685855                | NM_001282512              | TC2200008001.hg.1 |
| sharbo      | 0.2386192                | sharbo.aAug10-unspliced   | TC0Y00007303.hg.1 |
| blerbo      | 0.2386192                | blerbo.aAug10-unspliced   | TC0Y00007308.hg.1 |
| PNKD        | 0.29503325               | NM_001077399              | TC0200010791.hg.1 |
| teypoy      | 0.36982593               | teypoy.aAug10-unspliced   | TC1500010601.hg.1 |
| TIMM21      | 0.47899324               | NM_014177                 | TC1800007667.hg.1 |
| ECI2        | 0.34800848               | NM_001166010              | TC0600010647.hg.1 |
| KRR1        | 0.40118256               | NM_007043                 | TC1200011301.hg.1 |
| ATP5A1      | 0.35740972               | NM_001001935              | TC1800008584.hg.1 |
| ERGIC1      | 0.35517403               | NM_001031711              | TC0500009470.hg.1 |
| TMEM144     | 0.36965886               | NM_018342                 | TC0400012854.hg.1 |
| SERINC5     | 0.23867491               | NM_001174071              | TC0500011260.hg.1 |
| SLC25A6     | 0.46236864               | NM_001636                 | TC0Y00006882.hg.1 |
| DSC2        | 0.2763578                | NM_004949                 | TC1800009268.hg.1 |
| RPS16P5     | 0.41788086               | NR_046241                 | TC0600012073.hg.1 |
| CKMT1A      | 0.38017067               | NM_001015001              | TC1500007067.hg.1 |
| ARF6        | 0.324121                 | NM_001663                 | TC1400007098.hg.1 |
| juber       | 0.49661344               | juber.aAug10-unspliced    | TC0100006832.hg.1 |
| H2AFY2      | 0.44288647               | NM_018649                 | TC1000007913.hg.1 |
| PIGH        | 0.4095004                | NM_004569                 | TC1400009490.hg.1 |
| MCCC2       | 0.3196483                | NM_022132                 | TC0500007729.hg.1 |
| CDC20       | 0.28666273               | NM_001255                 | TC0100008057.hg.1 |
| ZBTB24      | 0.26842353               | NM_001164313              | TC0600014332.hg.1 |



| Gene Symbol  | Log2 ratio               | mRNA Accession            | Probe Set ID            |
|--------------|--------------------------|---------------------------|-------------------------|
|              | C42B-R vs. C42B Parental |                           |                         |
| SIM2         | 0.5361881                | NM_005069                 | TC2100007056.hg.1       |
| NKX3-1       | 0.16435982               | NM_001256339              | TC0800009885.hg.1       |
| XRCC3        | 0.27602476               | NM_001100118              | TC1400010331.hg.1       |
| BUB1         | 0.37584952               | NM_001278616              | TC0200013878.hg.1       |
| SLC10A7      | 0.449806                 | NM_001029998              | TC0400012057.hg.1       |
| timemi       | 0.38455427               | timemi.aAug10-unspliced   | TC1300008339.hg.1       |
| PRKD1        | 0.42288196               | NM_002742                 | TC1400008816.hg.1       |
| GPC6         | 0.29989374               | NM_005708                 | TC1300007718.hg.1       |
| RNU7-48P     | 0.4031717                | uc063pkx.1                | TC0600008470.hg.1       |
| SNX4         | 0.50013524               | NM_003794                 | TC0300012252.hg.1       |
| LRIG1        | 0.17873994               | NM_015541                 | TC0300011423.hg.1       |
| ARHGAP11B    | 0.22825971               | NM_001039841              | TC1500006785.hg.1       |
| munara       | 0.3707642                | munara.aAug10-unspliced   | TC2100007042.hg.1       |
| SLC45A2      | 0.177171                 | NM_001297417              | TC0500010456.hg.1       |
| koysno       | 0.23974797               | koysno.aAug10-unspliced   | TC1600010318.hg.1       |
| ANP32A       | 0.53166085               | NM_006305                 | TC1500009865.hg.1       |
| HMGB1        | 0.4518829                | NM_002128                 | TC1300008517.hg.1       |
| PFN1         | 0.41848212               | NM_005022                 | TC1700009539.hg.1       |
| NUCKS1       | 0.34123877               | NM_022731                 | TC0100017075.hg.1       |
| CD2AP        | 0.41604674               | NM_012120                 | TC0600008183.hg.1       |
| KIF20A       | 0.3513622                | NM_005733                 | TC0500008777.hg.1       |
| FGD4         | 0.3367115                | NM_001304480              | TC1200012617.hg.1       |
| IL1RAPL1     | 0.20057039               | NM_014271                 | TC0X00006865.hg.1       |
| DIAPH3       | 0.34201103               | NM_001042517              | TC1300009088.hg.1       |
| MIR4458      | 0.50332433               | NR_039663                 | TC0500006676.hg.1       |
| TDG          | 0.47353253               | NM_003211                 | TC1200008669.hg.1       |
| KIF15        | 0.33166784               | ENST00000631233           | TSUnmapped00000627.hg.1 |
| MLPH         | 0.30814454               | NM_001042467              | TC0200011251.hg.1       |
| NEDD4L       | 0.33894095               | NM_001144964              | TC1800007411.hg.1       |
| plerkyby     | 0.3199108                | plerkyby.aAug10-unspliced | TC1200008011.hg.1       |
| CLN6         | 0.34336314               | NM_017882                 | TC1500010887.hg.1       |
| SLC25A33     | 0.48149735               | NM_032315                 | TC0100006781.hg.1       |
| SENP7        | 0.50948095               | NM_001077203              | TC0300011853.hg.1       |
| YBX1         | 0.5049476                | NM_004559                 | TC0100008025.hg.1       |
| zarjyby      | 0.3353358                | zarjyby.aAug10-unspliced  | TC1200011358.hg.1       |
| ABHD14A-ACY1 | 0.43702936               | OTTHUMT00000349691        | TC0300013840.hg.1       |
| sputa        | 0.29172438               | sputa.aAug10-unspliced    | TC1500007807.hg.1       |
| TYMS         | 0.2758343                | NM_001071                 | TC1800006448.hg.1       |
| WWC1         | 0.3649045                | NM_001161661              | TC0500009346.hg.1       |
| NEK9         | 0.46871623               | NM_033116                 | TC1400009711.hg.1       |
| MELK         | 0.31517687               | NM_001256685              | TC0900007129.hg.1       |
| MOAP1        | 0.43198103               | NM_022151                 | TC1400010019.hg.1       |
| RRM2         | 0.28806388               | NM_001034                 | TC0200006677.hg.1       |
| DAPK1        | 0.36082718               | NM_001288729              | TC0900007807.hg.1       |
| rini         | 0.4190027                | rini.aAug10-unspliced     | TC0200008897.hg.1       |
| ACSL3        | 0.3783435                | NM_004457                 | TC0200010907.hg.1       |
| NEK2         | 0.31032336               | NM_001204182              | TC0100017216.hg.1       |
| EPHA3        | 0.27893412               | NM_005233                 | TC0300008029.hg.1       |
| ILF2         | 0.5002116                | NM_001267809              | TC0100015875.hg.1       |
| IFT88        | 0.53109074               | NM_006531                 | TC1300006503.hg.1       |
| ESRP2        | 0.36685258               | NM_024939                 | TC1600010676.hg.1       |
| NTNG1        | 0.21399915               | NM_001113226              | TC0100009307.hg.1       |
| DEFB134      | 0.49540353               | NM_001302695              | TC0800009626.hg.1       |
| FBXL17       | 0.43809125               | NM_001163315              | TC0500011655.hg.1       |

| Gene Symbol   | Log2 ratio               | mRNA Accession             | Probe Set ID      |
|---------------|--------------------------|----------------------------|-------------------|
|               | C42B-R vs. C42B Parental |                            |                   |
| mimira        | 0.48947382               | mimira.aAug10-unspliced    | TC0300012539.hg.1 |
| KIF23         | 0.37375492               | NM_001281301               | TC1500007699.hg.1 |
| TAOK3         | 0.13655189               | NM_016281                  | TC1200012111.hg.1 |
| ANLN          | 0.2862607                | NM_001284301               | TC0700007198.hg.1 |
| SEC23A        | 0.45338348               | NM_006364                  | TC1400009002.hg.1 |
| DDX24         | 0.4291318                | NM_020414                  | TC1400010039.hg.1 |
| foytaby       | 0.40464175               | foytaby.aAug10-unspliced   | TC0900011475.hg.1 |
| PTCH1         | 0.35308182               | NM_000264                  | TC0900010886.hg.1 |
| CCNB1         | 0.25894988               | NM_031966                  | TC0500007665.hg.1 |
| roydy         | 0.49512893               | roydy.aAug10-unspliced     | TC0100011339.hg.1 |
| MTCO3P2       | 0.3840261                | ENST00000457365            | TC1300008341.hg.1 |
| ELF5          | 0.40135887               | NM_001243080               | TC1100010514.hg.1 |
| BEND4         | 0.31355995               | NM_001159547               | TC0400010553.hg.1 |
| KLK3          | 0.28711143               | NM_001030047               | TC1900008607.hg.1 |
| HIST1H2AG     | 0.22220252               | NM_021064                  | TC0600014083.hg.1 |
| VPS13A        | 0.34589922               | NM_001018037               | TC0900007646.hg.1 |
| KIAA0391      | 0.5122039                | NM_001256678               | TC1400010595.hg.1 |
| SNORD116-19   | 0.34560978               | NR_001290                  | TC1500010700.hg.1 |
| CDK8          | 0.38814873               | NM_001260                  | TC1300006652.hg.1 |
| MTMR6         | 0.3956666                | NM_004685                  | TC1300008386.hg.1 |
| sukey         | 0.4230447                | sukey.aAug10-unspliced     | TC2000009724.hg.1 |
| SGK3          | 0.25628427               | NM_001033578               | TC0800012313.hg.1 |
| SFPQ          | 0.43931386               | NM_005066                  | TC0100018432.hg.1 |
| BMPR1B        | 0.23123476               | NM_001203                  | TC0400008183.hg.1 |
| ZNF24         | 0.42688167               | NM_001308123               | TC1800008458.hg.1 |
| LRPPRC        | 0.5606997                | NM_133259                  | TC0200012418.hg.1 |
| IARS2         | 0.45644376               | NM_018060                  | TC0100011648.hg.1 |
| FAM72C        | 0.3270693                | NM_001287385               | TC0100015550.hg.1 |
| CCDC59        | 0.4835724                | NM_014167                  | TC1200011400.hg.1 |
| HEBP2         | 0.375916                 | NM_014320                  | TC0600009611.hg.1 |
| SAP18         | 0.5344174                | NM_005870                  | TC1300006520.hg.1 |
| SORD          | 0.3865239                | NM_003104                  | TC1500007107.hg.1 |
| CTD-2165H16.3 | 0.3164789                | ENST00000503819            | TC0500006818.hg.1 |
| RACGAP1       | 0.32185745               | NM_001126103               | TC1200010650.hg.1 |
| narrobo       | 0.49617535               | narrobo.aAug10             | TC0100007056.hg.1 |
| CLPX          | 0.45414108               | NM_006660                  | TC1500009785.hg.1 |
| HJURP         | 0.3543657                | NM_001282962               | TC0200016099.hg.1 |
| smoydoybu     | 0.29765475               | smoydoybu.aAug10-unspliced | TC0200016199.hg.1 |
| RDH11         | 0.28973332               | NM_001252650               | TC1400010765.hg.1 |
| FOXA1         | 0.33198506               | NM_004496                  | TC1400008981.hg.1 |
| DENND1A       | 0.48897478               | NM_020946                  | TC0900011473.hg.1 |
| foyboyby      | 0.46238762               | foyboyby.aAug10-unspliced  | TC1400009947.hg.1 |
| RAN           | 0.6184955                | NM_001300796               | TC1200009416.hg.1 |
| LIFR          | 0.29280463               | NM_001127671               | TC0500010540.hg.1 |
| natobo        | 0.44247767               | natobo.aAug10-unspliced    | TC1100009113.hg.1 |
| teesparbu     | 0.5659554                | teesparbu.aAug10-unspliced | TC0600009212.hg.1 |
| ZNF271P       | 0.5083222                | NR_024565                  | TC1800009224.hg.1 |
| RP11-299A16.1 | 0.39356023               | ENST00000549144            | TC1200011387.hg.1 |
| MAPK12        | 0.5344366                | NM_001303252               | TC2200009361.hg.1 |
| NR3C2         | 0.27024943               | NM_000901                  | TC0400012078.hg.1 |
| ANK3          | 0.4311011                | NM_001149                  | TC1000010727.hg.1 |
| ABCC1         | 0.34423995               | ENST00000399408            | TC1600007022.hg.1 |
| AKT1          | 0.42122245               | NM_001014431               | TC1400010377.hg.1 |
| GUCY1A3       | 0.3828525                | NM_000856                  | TC0400009086.hg.1 |

| Gene Symbol   | Log2 ratio               | mRNA Accession            | Probe Set ID            |
|---------------|--------------------------|---------------------------|-------------------------|
|               | C42B-R vs. C42B Parental |                           |                         |
| SKA2          | 0.49627495               | NM_001100595              | TC1700011281.hg.1       |
| PHF8          | 0.37629598               | NM_001184896              | TC0X00009773.hg.1       |
| SLC41A1       | 0.35808146               | NM_173854                 | TC0100017079.hg.1       |
| fleejybu      | 0.3452867                | fleejybu.aAug10-unspliced | TC0200013632.hg.1       |
| gospoy        | 0.32074985               | gospoy.aAug10-unspliced   | TC1500007028.hg.1       |
| NFIB          | 0.3704507                | NM_001190737              | TC0900009569.hg.1       |
| CNKSR2        | 0.3673903                | NM_001168647              | TC0X00006758.hg.1       |
| jeezaw        | 0.421056                 | jeezaw.aAug10-unspliced   | TC1500006568.hg.1       |
| ETFB          | 0.41879007               | NM_001014763              | TC1900012016.hg.1       |
| ZNF397        | 0.48176062               | NM_001135178              | TC1800007071.hg.1       |
| RP11-134K13.2 | 0.38016275               | ENST00000454078           | TC0600012254.hg.1       |
| HNRNPAB       | 0.34353036               | NM_004499                 | TC0500009652.hg.1       |
| pynawbu       | 0.44925985               | pynawbu.aAug10-unspliced  | TC0100006885.hg.1       |
| KPNB1         | 0.33728483               | NM_001276453              | TC1700008133.hg.1       |
| TPT1P2        | 0.5830669                | ENST00000413105           | TC0200015576.hg.1       |
| ZC2HC1C       | 0.59368634               | NM_001042430              | TC1400007698.hg.1       |
| BAG1          | 0.45525038               | NM_001172415              | TC0900009855.hg.1       |
| noynoy        | 0.4063627                | noynoy.aAug10-unspliced   | TC1300009675.hg.1       |
| SNRPA1        | 0.5292234                | NM_003090                 | TC1500010659.hg.1       |
| FANCD2        | 0.45731786               | NM_001018115              | TC0300006575.hg.1       |
| TBRG1         | 0.58383816               | NM_032811                 | TC1100009395.hg.1       |
| UTY           | 0.3506408                | NM_001258249              | TC0Y00007074.hg.1       |
| CYC1          | 0.40678605               | NM_001916                 | TC0800009239.hg.1       |
| GABBR1        | 0.57983565               | NM_021903                 | TC0600014256.hg.1       |
| PALMD         | 0.4039666                | NM_017734                 | TC0100009183.hg.1       |
| CXCL12        | 0.28160012               | NM_000609                 | TC1000010468.hg.1       |
| RNF157        | 0.5439441                | NM_052916                 | TC1700011787.hg.1       |
| FUZ           | 0.37984273               | NM_001171937              | TC1900012001.hg.1       |
| ANGEL2        | 0.41840667               | NM_001300753              | TC0100017267.hg.1       |
| PRKCD         | 0.39211175               | NM_006254                 | TC0300007512.hg.1       |
| KLHL20        | 0.39303213               | NM_014458                 | TC0100010654.hg.1       |
| KIF22         | 0.3722794                | NM_001256269              | TC1600007425.hg.1       |
| NXPE3         | 0.35135555               | NM_001134456              | TC0300013854.hg.1       |
| reymeybo      | 0.56688315               | reymeybo.aAug10-unspliced | TC0100012420.hg.1       |
| TCP1          | 0.40203378               | NM_001008897              | TC0600013762.hg.1       |
| RMDN1         | 0.42244607               | NM_001286707              | TC0800011021.hg.1       |
| NDUFB10       | 0.33624062               | NM_004548                 | TC1600006574.hg.1       |
| EMC9          | 0.47888026               | NM_016049                 | TC1400010720.hg.1       |
| NUF2          | 0.26165643               | NM_031423                 | TC0100010397.hg.1       |
| RAB4A         | 0.36328965               | NM_001271998              | TC0100011901.hg.1       |
| NGDN          | 0.47207433               | NM_001042635              | TC1400010577.hg.1       |
| AC254944.3    | 0.25866434               | ENST00000633373           | TSUnmapped00000642.hg.1 |
| MICAL2        | 0.37170386               | NM_001282663              | TC1100012966.hg.1       |
| APEX1         | 0.35886616               | NM_001244249              | TC1400006519.hg.1       |
| TMEM106C      | 0.5600749                | NM_001143841              | TC1200007499.hg.1       |
| SNX5          | 0.43134022               | NM_001282454              | TC2000009986.hg.1       |
| EPPK1         | 0.36392793               | NM_031308                 | TC0800012173.hg.1       |
| ANKRD29       | 0.45737383               | NM_001308238              | TC1800008287.hg.1       |
| larklabu      | 0.45057094               | larklabu.aAug10-unspliced | TC1000008187.hg.1       |
| KLF5          | 0.32394165               | NM_001286818              | TC1300007491.hg.1       |
| PLK4          | 0.48964557               | NM_001190799              | TC0400008664.hg.1       |
| TPD52         | 0.5001518                | NM_001025252              | TC0800012433.hg.1       |
| PEBP1         | 0.41023007               | NM_002567                 | TC1200009071.hg.1       |
| GLUD1         | 0.41531926               | NM_005271                 | TC1000011323.hg.1       |

| Gene Symbol | Log2 ratio               | mRNA Accession             | Probe Set ID      |
|-------------|--------------------------|----------------------------|-------------------|
|             | C42B-R vs. C42B Parental |                            |                   |
| ZFYVE21     | 0.3636023                | NM_001198953               | TC1400008415.hg.1 |
| RIOK3       | 0.45406142               | NM_003831                  | TC1800006889.hg.1 |
| TMEM141     | 0.5360678                | NM_032928                  | TC0900012189.hg.1 |
| ECT2        | 0.38334417               | NM_001258315               | TC0300009524.hg.1 |
| ADK         | 0.62799495               | NM_001123                  | TC1000008063.hg.1 |
| PRKAR1B     | 0.35480964               | NM_001164758               | TC0700009980.hg.1 |
| CNTN3       | 0.3065296                | NM_020872                  | TC0300011566.hg.1 |
| GSS         | 0.5023408                | NM_000178                  | TC2000008951.hg.1 |
| hetura      | 0.42098624               | hetura.aAug10-unspliced    | TC0900010567.hg.1 |
| steesawby   | 0.3039175                | steesawby.aAug10-unspliced | TC0600007620.hg.1 |
| ARHGFE26    | 0.43793955               | NM_001251962               | TC0300009247.hg.1 |
| PDE9A       | 0.33857653               | NM_001001567               | TC2100007263.hg.1 |
| yaka        | 0.40206742               | yaka.aAug10-unspliced      | TC0400012080.hg.1 |
| ADAM9       | 0.5030958                | NM_003816                  | TC0800007367.hg.1 |
| EFCAB12     | 0.238082                 | NM_207307                  | TC0300012392.hg.1 |
| TLK1        | 0.3972267                | NM_001136554               | TC0200014893.hg.1 |
| MTHFD1      | 0.46834892               | NM_005956                  | TC1400007440.hg.1 |
| UBE2T       | 0.43260032               | NM_001310326               | TC0100016952.hg.1 |
| SLC39A6     | 0.38609526               | NM_001099406               | TC1800008474.hg.1 |
| ELOVL5      | 0.49991712               | NM_001242828               | TC0600012072.hg.1 |
| ZNF217      | 0.4334751                | NM_006526                  | TC2000009504.hg.1 |
| PAK1IP1     | 0.46362332               | NM_017906                  | TC0600006926.hg.1 |
| RUVBL1      | 0.53666615               | NM_003707                  | TC0300014041.hg.1 |
| POLQ        | 0.3772788                | NM_199420                  | TC0300012164.hg.1 |
| RAD51       | 0.46302542               | NM_001164269               | TC1500006965.hg.1 |
| CKAP2       | 0.30626553               | NM_001098525               | TC1300007248.hg.1 |
| FAM21C      | 0.59869045               | NM_001169106               | TC1000007483.hg.1 |
| flasmee     | 0.55927515               | flasmee.aAug10-unspliced   | TC1700007664.hg.1 |
| CRNKL1      | 0.45674998               | NM_001278625               | TC2000008573.hg.1 |
| ACADSB      | 0.41667643               | NM_001609                  | TC1000009169.hg.1 |
| PIAS2       | 0.5429803                | NM_004671                  | TC1800009277.hg.1 |
| spofeybu    | 0.3030643                | spofeybu.aAug10-unspliced  | TC0200010153.hg.1 |
| TMEM87A     | 0.4031513                | NM_001110503               | TC1500009185.hg.1 |
| STMN1       | 0.4238215                | NM_001145454               | TC0100013369.hg.1 |
| ISYNA1      | 0.44977745               | NM_001170938               | TC1900010016.hg.1 |
| RIPK4       | 0.2818225                | NM_020639                  | TC2100008222.hg.1 |
| FAM111A     | 0.4508963                | NM_001142519               | TC1100007728.hg.1 |
| ZFYVE16     | 0.4000161                | NM_001105251               | TC0500007912.hg.1 |
| MYO6        | 0.41921926               | NM_001300899               | TC0600008569.hg.1 |
| PPP4R1      | 0.47668493               | NM_001042388               | TC1800008035.hg.1 |
| C1QTNF3     | 0.28285766               | NM_030945                  | TC0500013298.hg.1 |
| EZR         | 0.36998093               | NM_001111077               | TC0600013727.hg.1 |
| DCXR        | 0.2795626                | NM_001195218               | TC1700012089.hg.1 |
| DDT         | 0.3362822                | NM_001084392               | TC2200008203.hg.1 |
| TTC21B      | 0.3856894                | NM_024753                  | TC0200016747.hg.1 |
| MCCC1       | 0.513701                 | NM_001293273               | TC0300013334.hg.1 |
| MIPOL1      | 0.4788423                | ENST00000624539            | TC1400006945.hg.1 |
| FAM103A1    | 0.47701406               | BC003627_2                 | TC0600013898.hg.1 |
| ZBTB16      | 0.3234695                | NM_001018011               | TC1100009101.hg.1 |
| SBNO1       | 0.5172215                | NM_001167856               | TC1200012267.hg.1 |
| SLC24A5     | 0.48911297               | NM_205850                  | TC1500007156.hg.1 |
| titari      | 0.3180082                | titari.aAug10-unspliced    | TC1700010782.hg.1 |
| suraw       | 0.5245537                | suraw.aAug10-unspliced     | TC2000007871.hg.1 |
| BAZ1A       | 0.5356686                | NM_013448                  | TC1400008921.hg.1 |

| Gene Symbol   | Log2 ratio               | mRNA Accession              | Probe Set ID      |
|---------------|--------------------------|-----------------------------|-------------------|
|               | C42B-R vs. C42B Parental |                             |                   |
| KIF15         | 0.3740754                | NM_020242                   | TC0300007223.hg.1 |
| SLC4A4        | 0.29856068               | NM_001098484                | TC0400007799.hg.1 |
| GRK1          | 0.55618113               | BC140945                    | TC1300008149.hg.1 |
| SPDL1         | 0.43520954               | NM_017785                   | TC0500009377.hg.1 |
| ADSL          | 0.41026914               | NM_000026                   | TC2200009275.hg.1 |
| skarsteyby    | 0.443283                 | skarsteyby.aAug10-unspliced | TC0500008264.hg.1 |
| ALDH6A1       | 0.36875987               | NM_001278593                | TC1400009684.hg.1 |
| EVL           | 0.5096684                | NM_016337                   | TC1400008193.hg.1 |
| TTC6          | 0.34719765               | NM_001310135                | TC1400010599.hg.1 |
| SLC25A6       | 0.49791104               | ENST00000381401             | TC0X00008908.hg.1 |
| VASH2         | 0.4435645                | NM_001136474                | TC0100011552.hg.1 |
| PRMT5         | 0.48022914               | NM_001039619                | TC1400008684.hg.1 |
| NDUFV1        | 0.39669672               | NM_001166102                | TC1100008147.hg.1 |
| skaspeyby     | 0.30640018               | skaspeyby.aAug10-unspliced  | TC0600008864.hg.1 |
| swerslyby     | 0.3140467                | swerslyby.aAug10-unspliced  | TC0300011837.hg.1 |
| LARP7         | 0.5211242                | NM_001267039                | TC0400008443.hg.1 |
| leebly        | 0.5281036                | leebly.aAug10-unspliced     | TC1800009205.hg.1 |
| HEATR5A       | 0.45703176               | NM_015473                   | TC1400010728.hg.1 |
| PIK3AP1       | 0.37018564               | NM_152309                   | TC1000011524.hg.1 |
| sleyblaby     | 0.30314198               | sleyblaby.aAug10-unspliced  | TC0500011736.hg.1 |
| HMG2          | 0.51322186               | NM_005517                   | TC0100007463.hg.1 |
| PPM1A         | 0.61204994               | NM_021003                   | TC1400007354.hg.1 |
| KIAA0101      | 0.31054652               | NM_001029989                | TC1500009738.hg.1 |
| CAPS2         | 0.5079297                | NM_001286547                | TC1200011298.hg.1 |
| AURKA         | 0.32011145               | NM_003600                   | TC2000009550.hg.1 |
| skoter        | 0.55102247               | skoter.aAug10-unspliced     | TC1500008777.hg.1 |
| RPS6KC1       | 0.36114416               | NM_001136138                | TC0100011554.hg.1 |
| NCAPD3        | 0.62688273               | NM_015261                   | TC1100012917.hg.1 |
| spawsmoybu    | 0.21681145               | spawsmoybu.aAug10-unspliced | TC0700008883.hg.1 |
| PSMA4         | 0.46559218               | NM_001102667                | TC1500007979.hg.1 |
| IVD           | 0.36071888               | NM_001159508                | TC1500010720.hg.1 |
| UQCRC1        | 0.4459037                | NM_003365                   | TC0300011029.hg.1 |
| HIST1H3I      | 0.30473334               | NM_003533                   | TC0600011233.hg.1 |
| skoyklee      | 0.4531795                | skoyklee.aAug10-unspliced   | TC1500009624.hg.1 |
| ANKRD18B      | 0.5432424                | NM_001244752                | TC0900006986.hg.1 |
| woysperby     | 0.34512398               | woysperby.aAug10-unspliced  | TC0400009724.hg.1 |
| FAM72D        | 0.31749475               | NM_207418                   | TC0100009723.hg.1 |
| HMG2P22       | 0.5714515                | ENST00000427588             | TC0200013645.hg.1 |
| ACY1          | 0.37561074               | NM_000666                   | TC0300013839.hg.1 |
| EFCAB11       | 0.46855548               | NM_001284266                | TC1400010775.hg.1 |
| RAD23B        | 0.49676886               | NM_001244713                | TC0900008345.hg.1 |
| HIST1H4C      | 0.35986647               | NM_003542                   | TC0600007268.hg.1 |
| PA2G4         | 0.49768442               | NM_006191                   | TC1200012644.hg.1 |
| CTD-2089O24.2 | 0.5559397                | ENST00000509899             | TC0500011693.hg.1 |
| DIP2A         | 0.5080272                | NM_001146115                | TC2100007467.hg.1 |
| GALK2         | 0.4717398                | NM_001001556                | TC1500007180.hg.1 |
| GFM1          | 0.5042876                | NM_001308164                | TC0300009313.hg.1 |
| ECHDC3        | 0.4734487                | NM_024693                   | TC1000006782.hg.1 |
| BIRC5         | 0.45699316               | NM_001012270                | TC1700009043.hg.1 |
| SDR39U1       | 0.48289615               | NM_001290292                | TC1400008760.hg.1 |
| AS3MT         | 0.5401746                | NM_020682                   | TC1000012496.hg.1 |
| LOC440434     | 0.52549684               | NR_036750_3                 | TC1700010516.hg.1 |
| MPHOSPH9      | 0.35958567               | NM_022782                   | TC1200012263.hg.1 |
| HMG2P6        | 0.48975417               | OTTHUMT00000408473          | TC1400008772.hg.1 |

| Gene Symbol   | Log2 ratio               | mRNA Accession             | Probe Set ID      |
|---------------|--------------------------|----------------------------|-------------------|
|               | C42B-R vs. C42B Parental |                            |                   |
| KIF20B        | 0.42841735               | NM_001284259               | TC1000008406.hg.1 |
| GTF2I         | 0.55467445               | NM_001163636               | TC0700008010.hg.1 |
| TBC1D8        | 0.44864577               | NM_001102426               | TC0200016717.hg.1 |
| DCAF6         | 0.4392419                | NM_001017977               | TC0100010518.hg.1 |
| swypoby       | 0.3998323                | swypoby.aAug10-unspliced   | TC1400007502.hg.1 |
| ACIN1         | 0.53526825               | NM_001164814               | TC1400008694.hg.1 |
| GCFC2         | 0.41635793               | NM_001201334               | TC0200013137.hg.1 |
| GET4          | 0.35419556               | NM_015949                  | TC0700013324.hg.1 |
| NCAPG         | 0.36457863               | NM_022346                  | TC0400006994.hg.1 |
| FPGS          | 0.40481937               | NM_001018078               | TC0900008827.hg.1 |
| CIPC          | 0.487878                 | NM_033426                  | TC1400010634.hg.1 |
| FAM72B        | 0.32704642               | NM_001100910               | TC0100015509.hg.1 |
| morzorby      | 0.4562262                | morzorby.aAug10-unspliced  | TC0500007642.hg.1 |
| UBE2E4P       | 0.39943308               | NR_110506                  | TC0X00006666.hg.1 |
| WLS           | 0.47495472               | NM_001002292               | TC0100014531.hg.1 |
| CDH26         | 0.44236112               | NM_021810                  | TC2000007943.hg.1 |
| narna         | 0.41452712               | narna.aAug10-unspliced     | TC1100012367.hg.1 |
| swosa         | 0.517973                 | swosa.aAug10               | TC1700011559.hg.1 |
| kawwer        | 0.570126                 | kawwer.aAug10-unspliced    | TC1700010483.hg.1 |
| flarabu       | 0.3971643                | flarabu.aAug10-unspliced   | TC0100017071.hg.1 |
| ACACA         | 0.4545591                | NM_198834                  | TC1700010488.hg.1 |
| moromi        | 0.35541314               | moromi.aAug10-unspliced    | TC1400008821.hg.1 |
| RP11-996F15.4 | 0.4840695                | OTTHUMT00000474523         | TC1200010246.hg.1 |
| HIST2H3A      | 0.30260772               | ENST00000403683            | TC0100009877.hg.1 |
| glorgler      | 0.5126461                | glorgler.aAug10-unspliced  | TC1100009830.hg.1 |
| PMCHL2        | 0.30508903               | NR_003922                  | TC0500007722.hg.1 |
| florgar       | 0.58892053               | florgar.aAug10-unspliced   | TC0X00010585.hg.1 |
| bygar         | 0.58892053               | bygar.aAug10-unspliced     | TC0X00010578.hg.1 |
| jubabu        | 0.3765409                | jubabu.aAug10-unspliced    | TC0300008185.hg.1 |
| DNAH5         | 0.23655511               | NM_001369                  | TC0500010148.hg.1 |
| C1QBP         | 0.58807564               | NM_001212                  | TC1700012341.hg.1 |
| CENPJ         | 0.4520132                | NM_018451                  | TC1300008371.hg.1 |
| NR6A1         | 0.54203063               | NM_001278546               | TC0900011501.hg.1 |
| RP11-490K7.1  | 0.5037431                | ENST00000441274            | TC0100013554.hg.1 |
| smuswawbu     | 0.41096988               | smuswawbu.aAug10-unspliced | TC0500008713.hg.1 |
| vollo         | 0.31745464               | vollo.aAug10-unspliced     | TC1800007419.hg.1 |
| RBM12         | 0.47325093               | NM_001198838               | TC2000010007.hg.1 |
| METTL3        | 0.45550555               | NM_019852                  | TC1400008636.hg.1 |
| TPX2          | 0.3373943                | NM_012112                  | TC2000007089.hg.1 |
| HGH1          | 0.44923848               | NM_016458                  | TC0800009242.hg.1 |
| CDC73         | 0.60068417               | NM_024529                  | TC0100011027.hg.1 |
| KPNA2         | 0.46684107               | NM_002266                  | TC1700008719.hg.1 |
| reeteebo      | 0.43674248               | reeteebo.aAug10-unspliced  | TC0900011112.hg.1 |
| cheeklar      | 0.5044209                | cheeklar.aAug10-unspliced  | TC1800007906.hg.1 |
| rerplar       | 0.37952906               | rerplar.aAug10-unspliced   | TC1100007871.hg.1 |
| HN1           | 0.45646855               | NM_001002032               | TC1700012468.hg.1 |
| RP11-380B4.3  | 0.33276784               | OTTHUMT00000474773         | TC1300006813.hg.1 |
| FAM216A       | 0.5550853                | NM_013300                  | TC1200008843.hg.1 |
| swawchu       | 0.33273834               | swawchu.aAug10-unspliced   | TC1200009726.hg.1 |
| ACOT1         | 0.44290358               | NM_001037161               | TC1400007644.hg.1 |
| ARFGEF3       | 0.38207057               | NM_020340                  | TC0600009606.hg.1 |
| SLC2A3P1      | 0.589518                 | ENST00000519666            | TC0500013398.hg.1 |
| LRRC58        | 0.4514726                | NM_001099678               | TC0300012143.hg.1 |
| C15orf61      | 0.5366675                | NM_001143936               | TC1500007644.hg.1 |

| Gene Symbol     | Log2 ratio               | mRNA Accession             | Probe Set ID      |
|-----------------|--------------------------|----------------------------|-------------------|
|                 | C42B-R vs. C42B Parental |                            |                   |
| COPS3           | 0.5833752                | NM_001199125               | TC1700009928.hg.1 |
| ATP6V1G2-DDX39B | 0.47000057               | OTTHUMT00000355085         | TC0600014259.hg.1 |
| SLC25A30        | 0.35315812               | NM_001010875               | TC1300008824.hg.1 |
| PLCB4           | 0.3078938                | NM_000933                  | TC2000006674.hg.1 |
| SIRT1           | 0.48724964               | NM_001142498               | TC1000007846.hg.1 |
| ferborbo        | 0.5128306                | ferborbo.aAug10-unspliced  | TC0400012474.hg.1 |
| vawslorbu       | 0.40539122               | vawslorbu.aAug10-unspliced | TC0700010158.hg.1 |
| HIST2H3A        | 0.28990564               | NM_001005464               | TC0100015701.hg.1 |
| doyskabu        | 0.3917938                | doyskabu.aAug10-unspliced  | TC0900012071.hg.1 |
| SNW1            | 0.5053038                | NM_012245                  | TC1400009793.hg.1 |
| SRGAP1          | 0.54046434               | NM_020762                  | TC1200007992.hg.1 |
| RCN2            | 0.58248293               | NM_001271837               | TC1500007926.hg.1 |
| snogarbu        | 0.39408144               | snogarbu.aAug10-unspliced  | TC0200015740.hg.1 |
| CBS             | 0.49238095               | NM_001178008               | TC2100008285.hg.1 |
| USP22           | 0.5444251                | NM_015276                  | TC1700010076.hg.1 |
| NSMAF           | 0.5124762                | NM_001144772               | TC0800010553.hg.1 |
| snamu           | 0.50297415               | snamu.aAug10-unspliced     | TC1000008093.hg.1 |
| CTPS2           | 0.5248332                | NM_001144002               | TC0X00009153.hg.1 |
| THOC3           | 0.442024                 | NM_032361                  | TC0500013414.hg.1 |
| CPNE7           | 0.3142505                | NM_014427                  | TC1600008889.hg.1 |
| shuferbu        | 0.55468684               | shuferbu.aAug10-unspliced  | TC0300012858.hg.1 |
| chawshaby       | 0.383499                 | chawshaby.aAug10-unspliced | TC0500009473.hg.1 |
| THOC5           | 0.6010576                | NM_001002877               | TC2200009335.hg.1 |
| RP11-492D6.3    | 0.50888956               | ENST00000557586            | TC1500008611.hg.1 |
| SNRPN           | 0.5263334                | NM_003097                  | TC1500010698.hg.1 |
| FAM103A1        | 0.46384513               | NM_031452                  | TC1500008105.hg.1 |
| UNC5A           | 0.49364874               | NM_133369                  | TC0500009603.hg.1 |
| FAM50B          | 0.60161567               | NM_012135                  | TC0600006714.hg.1 |
| SFXN2           | 0.38283017               | NM_178858                  | TC1000008749.hg.1 |
| HMG20B          | 0.3193636                | NM_006339                  | TC1900006645.hg.1 |
| CDC42SE1        | 0.5644814                | NM_001038707               | TC0100018486.hg.1 |
| FAM179B         | 0.40688616               | NM_001308120               | TC1400007033.hg.1 |
| DHFR            | 0.5037779                | BC070280                   | TC1800008333.hg.1 |
| IGF1            | 0.388195                 | NM_000618                  | TC1200011727.hg.1 |
| basko           | 0.546372                 | basko.aAug10-unspliced     | TC1800009037.hg.1 |
| PPP5C           | 0.4715483                | NM_001204284               | TC1900008372.hg.1 |
| RFX7            | 0.4799321                | NM_022841                  | TC1500009514.hg.1 |
| GNG5            | 0.64146954               | NM_005274                  | TC0100014752.hg.1 |
| HIST1H4J        | 0.4420709                | NM_021968                  | TC0600007378.hg.1 |
| RP11-292K15.1   | 0.4901269                | ENST00000604494            | TC0200008611.hg.1 |
| CCDC88C         | 0.42444608               | NM_001080414               | TC1400009980.hg.1 |
| HELLS           | 0.4641056                | NM_001289067               | TC1000012477.hg.1 |
| ZFY             | 0.41554436               | NM_001145275               | TC0Y00006487.hg.1 |
| ZNHIT3          | 0.6281227                | NM_001281432               | TC1700007634.hg.1 |
| NVL             | 0.3446228                | NM_001243146               | TC0100017467.hg.1 |
| LPAR3           | 0.43545845               | NM_012152                  | TC0100014766.hg.1 |
| NPPC            | 0.44196656               | NM_024409                  | TC0200016047.hg.1 |
| vowaw           | 0.44001612               | vowaw.aAug10-unspliced     | TC2000008363.hg.1 |
| AP4S1           | 0.53365564               | NM_001128126               | TC1400006833.hg.1 |
| ZNF850          | 0.37326476               | NM_001193552               | TC1900010533.hg.1 |
| USP14           | 0.50795335               | NM_001037334               | TC1800006437.hg.1 |
| jawwu           | 0.40663308               | jawwu.aAug10-unspliced     | TC1800007865.hg.1 |
| snoydarbu       | 0.41579497               | snoydarbu.aAug10-unspliced | TC0200012965.hg.1 |
| MRRF            | 0.58635247               | NM_001173512               | TC0900012168.hg.1 |

| Gene Symbol  | Log2 ratio               | mRNA Accession             | Probe Set ID            |
|--------------|--------------------------|----------------------------|-------------------------|
|              | C42B-R vs. C42B Parental |                            |                         |
| PEBP1P2      | 0.45017985               | OTTHUMT00000468819         | TC0200013260.hg.1       |
| GMNN         | 0.51811886               | NM_001251989               | TC0600007207.hg.1       |
| bypla        | 0.49483213               | bypla.aAug10-unspliced     | TC1800006709.hg.1       |
| RP11-511H9.3 | 0.4667998                | ENST00000552036            | TC1200011713.hg.1       |
| STK39        | 0.45183507               | NM_013233                  | TC0200014834.hg.1       |
| EIF2AK4      | 0.5377841                | NM_001013703               | TC1500006930.hg.1       |
| marreybu     | 0.3624884                | marreybu.aAug10-unspliced  | TC0300011558.hg.1       |
| DDTL         | 0.3729007                | NM_001084393               | TC2200006874.hg.1       |
| ARHGAP11B    | 0.331973                 | BC105788                   | TC1500010707.hg.1       |
| spuskerbu    | 0.44177732               | spuskerbu.aAug10-unspliced | TC0800011666.hg.1       |
| TBC1D3L      | 0.4612347                | OTTHUMT00000477403         | TC1700012395.hg.1       |
| flokubo      | 0.40294802               | flokubo.aAug10-unspliced   | TC0200013843.hg.1       |
| REPS2        | 0.355074                 | NM_001080975               | TC0X00006704.hg.1       |
| HIVEP1       | 0.44757175               | NM_002114                  | TC0600014074.hg.1       |
| FANCA        | 0.47377378               | NM_000135                  | TC1600011292.hg.1       |
| ITPK1        | 0.49310368               | NM_001142593               | TC1400010015.hg.1       |
| N6AMT2       | 0.44141588               | NM_174928                  | TC1300008264.hg.1       |
| GINS1        | 0.3616711                | NM_021067                  | TC2000007016.hg.1       |
| RP11-49K24.5 | 0.5703032                | ENST00000588843            | TC1800007242.hg.1       |
| ZWINT        | 0.4332938                | NM_001005413               | TC1000010686.hg.1       |
| PDZRN3       | 0.37808138               | NM_001303139               | TC0300011550.hg.1       |
| MRPL37       | 0.55341005               | NM_016491                  | TC0100008383.hg.1       |
| CDCA2        | 0.38652524               | NM_152562                  | TC0800007065.hg.1       |
| C1orf116     | 0.26104504               | NM_001083924               | TC0100017116.hg.1       |
| PHF10        | 0.5350194                | NM_018288                  | TC0600014374.hg.1       |
| ANTXR1       | 0.41467232               | NM_018153                  | TC0200007908.hg.1       |
| GANC         | 0.4332393                | NM_001301409               | TC1500010724.hg.1       |
| buney        | 0.21448067               | buney.aAug10-unspliced     | TC1200011096.hg.1       |
| fleecha      | 0.5670341                | fleecha.aAug10-unspliced   | TC2200007375.hg.1       |
| TOPBP1       | 0.5231038                | NM_007027                  | TC0300012475.hg.1       |
| DDHD1        | 0.518078                 | NM_001160147               | TC1400009198.hg.1       |
| CENPE        | 0.36218575               | NM_001286734               | TC0400011477.hg.1       |
| steyswabu    | 0.39305443               | steyswabu.aAug10-unspliced | TC0400012058.hg.1       |
| LRRC41       | 0.5029992                | NM_006369                  | TC0100014050.hg.1       |
| chateebo     | 0.46080166               | chateebo.aAug10-unspliced  | TC0900011504.hg.1       |
| DHCR24       | 0.29359323               | NM_014762                  | TC0100014276.hg.1       |
| C16orf47     | 0.61414534               | NM_207385                  | TC1600010837.hg.1       |
| ANKH         | 0.2953773                | NM_054027                  | TC0500010169.hg.1       |
| SPECC1L      | 0.4498078                | NM_001145468               | TC2200009232.hg.1       |
| SURF2        | 0.58516955               | ENST00000630633            | TSUnmapped00000645.hg.1 |
| ANKRD18A     | 0.447803                 | NM_147195                  | TC0900010056.hg.1       |
| MRPL50P4     | 0.6036548                | ENST00000446432            | TC1000010721.hg.1       |
| tawkoyby     | 0.46899974               | tawkoyby.aAug10-unspliced  | TC1500008742.hg.1       |
| ploko        | 0.39340684               | ploko.aAug10-unspliced     | TC0700008118.hg.1       |
| PGC          | 0.58806777               | NM_001166424               | TC0600011800.hg.1       |
| FTL          | 0.49715453               | NM_000146                  | TC1900008507.hg.1       |
| C1QTNF9B-AS1 | 0.46001562               | ENST00000626707            | TC1300008354.hg.1       |
| ANKRD16      | 0.4167979                | NM_001009941               | TC1000009685.hg.1       |
| GRTP1        | 0.4795477                | NM_001286732               | TC1300009898.hg.1       |
| DSG1-AS1     | 0.44299492               | NR_110788                  | TC1800008391.hg.1       |
| RABGGTA      | 0.49729913               | NM_004581                  | TC1400008749.hg.1       |
| flawkerbu    | 0.43726686               | flawkerbu.aAug10-unspliced | TC0300009525.hg.1       |
| HNRNPM       | 0.56403583               | NM_001297418               | TC1900006896.hg.1       |
| SUPT16H      | 0.49480245               | NM_007192                  | TC1400008628.hg.1       |



| Gene Symbol   | Log2 ratio               | mRNA Accession            | Probe Set ID      |
|---------------|--------------------------|---------------------------|-------------------|
|               | C42B-R vs. C42B Parental |                           |                   |
| zorflo        | 0.3359878                | zorflo.aAug10-unspliced   | TC0500011265.hg.1 |
| SLC43A1       | 0.38509548               | NM_001198810              | TC1100010893.hg.1 |
| SMCHD1        | 0.51081747               | NM_015295                 | TC1800006487.hg.1 |
| AK5           | 0.30435124               | NM_012093                 | TC0100008797.hg.1 |
| ALYREF        | 0.56492716               | NM_005782                 | TC1700012078.hg.1 |
| galerby       | 0.45747203               | galerby.aAug10-unspliced  | TC1100009108.hg.1 |
| wawplabu      | 0.42711604               | wawplabu.aAug10-unspliced | TC0900011716.hg.1 |
| PSMC1P5       | 0.5066039                | ENST00000512850           | TC0500008258.hg.1 |
| RFX3          | 0.4212338                | NM_001282116              | TC0900009414.hg.1 |
| PCYT2         | 0.47380823               | NM_001184917              | TC1700012079.hg.1 |
| LIPT1         | 0.4635479                | NM_001204830              | TC0200016498.hg.1 |
| PCNA          | 0.52286285               | NM_002592                 | TC2000008279.hg.1 |
| UAP1L1        | 0.47232428               | NM_207309                 | TC0900009259.hg.1 |
| ruyura        | 0.37359488               | ruyura.aAug10-unspliced   | TC0200011383.hg.1 |
| TIMM9P1       | 0.45987964               | ENST00000436122           | TC1000011053.hg.1 |
| POLR1D        | 0.5329166                | NM_001206559              | TC1300006690.hg.1 |
| SPC25         | 0.38880345               | NM_020675                 | TC0200014845.hg.1 |
| SYNGR2        | 0.395677                 | NM_004710                 | TC1700009040.hg.1 |
| GYS1          | 0.5489342                | NM_001161587              | TC1900011113.hg.1 |
| FO082796.1    | 0.6236664                | uc064xof.1                | TC0900009337.hg.1 |
| POLR3A        | 0.50877184               | NM_007055                 | TC1000011135.hg.1 |
| HMGCS2        | 0.40646768               | NM_001166107              | TC0100015476.hg.1 |
| HMGB2         | 0.4243033                | NM_001130688              | TC0400012432.hg.1 |
| SEC23IP       | 0.5455924                | NM_007190                 | TC1000009095.hg.1 |
| MND1          | 0.43333137               | NM_001253861              | TC0400009037.hg.1 |
| skorby        | 0.5538103                | skorby.aAug10-unspliced   | TC0100008386.hg.1 |
| MAPK6         | 0.58080816               | NM_002748                 | TC1500010743.hg.1 |
| RP11-523H24.3 | 0.40864602               | ENST00000423023.2         | TC1300006475.hg.1 |
| NDUFS2        | 0.51578885               | NM_001166159              | TC0100010340.hg.1 |
| THUMPD2       | 0.58832085               | NM_025264                 | TC0200012335.hg.1 |
| ZNF532        | 0.51026833               | NM_018181                 | TC1800007440.hg.1 |
| RNF31         | 0.4634247                | NM_001310332              | TC1400010583.hg.1 |
| LMNB1         | 0.3586973                | NM_001198557              | TC0500008544.hg.1 |
| NCL           | 0.43537042               | NM_005381                 | TC0200016018.hg.1 |
| C16orf70      | 0.4627001                | NM_025187                 | TC1600008144.hg.1 |
| ADPRHL1       | 0.49212754               | NM_138430                 | TC1300009906.hg.1 |
| DTL           | 0.5244777                | NM_001286229              | TC0100011512.hg.1 |
| FBXO9         | 0.5130895                | NM_012347                 | TC0600008272.hg.1 |
| ARL4AP1       | 0.5907149                | OTTHUMT00000048210        | TC1000007746.hg.1 |
| ARHGDI1       | 0.45357972               | NM_001185077              | TC1700012076.hg.1 |
| CDCA8         | 0.40365022               | NM_001256875              | TC0100007841.hg.1 |
| RP11-428P16.2 | 0.4777028                | ENST00000394628           | TC1000008141.hg.1 |
| AFF3          | 0.48423874               | NM_001025108              | TC0200013616.hg.1 |
| SNX6          | 0.6242106                | NM_021249                 | TC1400008913.hg.1 |
| SETDB2        | 0.46258482               | NM_001160308              | TC1300007164.hg.1 |
| BCHE          | 0.37906632               | NM_000055                 | TC0300013025.hg.1 |
| SCARF2        | 0.4983522                | NM_153334                 | TC2200009316.hg.1 |
| bawwaw        | 0.5893574                | bawwaw.aAug10-unspliced   | TC1700009071.hg.1 |
| duspoyby      | 0.4026641                | duspoyby.aAug10-unspliced | TC0300007163.hg.1 |
| CIRBP         | 0.4957005                | NM_001280                 | TC1900006524.hg.1 |
| leyreyby      | 0.57445896               | leyreyby.aAug10-unspliced | TC1500010685.hg.1 |
| TMEM38B       | 0.4955472                | NM_018112                 | TC0900008318.hg.1 |
| gupla         | 0.5598206                | gupla.aAug10-unspliced    | TC1500009774.hg.1 |
| HIST2H2BF     | 0.47186053               | NM_001024599              | TC0100015696.hg.1 |

| Gene Symbol  | Log2 ratio               | mRNA Accession             | Probe Set ID            |
|--------------|--------------------------|----------------------------|-------------------------|
|              | C42B-R vs. C42B Parental |                            |                         |
| XPO6         | 0.55591255               | NM_001270940               | TC1600009849.hg.1       |
| plerdoby     | 0.5506005                | plerdoby.aAug10-unspliced  | TC1300007746.hg.1       |
| HIST1H2BJ    | 0.31735694               | NM_021058                  | TC0600011184.hg.1       |
| jorsno       | 0.3005757                | jorsno.aAug10-unspliced    | TC1600010317.hg.1       |
| TK1          | 0.38798255               | NM_003258                  | TC1700011892.hg.1       |
| QARS         | 0.4150439                | NM_001272073               | TC0300011050.hg.1       |
| DNAJA2       | 0.65016097               | NM_005880                  | TC1600010179.hg.1       |
| ZNF511       | 0.50889003               | NM_145806                  | TC1000012510.hg.1       |
| IDH3A        | 0.4949564                | NM_005530                  | TC1500010776.hg.1       |
| PRR5         | 0.51599747               | NM_001017528               | TC2200009283.hg.1       |
| MCM3         | 0.49204892               | NM_001270472               | TC0600012038.hg.1       |
| DBT          | 0.53509057               | NM_001918                  | TC0100015061.hg.1       |
| LRRC26       | 0.1923853                | NM_001013653               | TC0900012292.hg.1       |
| smeysmar     | 0.5170932                | smeysmar.aAug10-unspliced  | TC1700012031.hg.1       |
| SNTA1        | 0.54773855               | NM_003098                  | TC2000008885.hg.1       |
| FBXO34       | 0.537406                 | NM_017943                  | TC1400007232.hg.1       |
| PWP2         | 0.461161                 | NM_005049                  | TC2100008538.hg.1       |
| SMARCC1      | 0.6105502                | NM_003074                  | TC0300010990.hg.1       |
| ADPGK        | 0.48194772               | NM_031284                  | TC1500009973.hg.1       |
| PIK3R1       | 0.5444208                | NM_001242466               | TC0500007641.hg.1       |
| RP5-1087E8.2 | 0.47500125               | ENST00000438895            | TC0100017546.hg.1       |
| UBE2J1       | 0.44526744               | NM_016021                  | TC0600012542.hg.1       |
| SMAD6        | 0.28079492               | NM_005585                  | TC1500007619.hg.1       |
| DPP4         | 0.34977126               | NM_001935                  | TC0200014764.hg.1       |
| DICER1       | 0.36728668               | NM_001195573               | TC1400010068.hg.1       |
| kawcheyby    | 0.4223753                | kawcheyby.aAug10-unspliced | TC0800011977.hg.1       |
| zyblu        | 0.3723442                | zyblu.aAug10-unspliced     | TC1200012275.hg.1       |
| HIST1H2BK    | 0.3872197                | NM_001312653               | TC0600011185.hg.1       |
| SLC25A11     | 0.47004586               | NM_001165417               | TC1700009538.hg.1       |
| PCBP2        | 0.54769474               | NM_001098620               | TC1200012636.hg.1       |
| bylee        | 0.5562395                | bylee.aAug10-unspliced     | TC2000007186.hg.1       |
| CKBP1        | 0.56606174               | OTTHUMT00000430620         | TC1600010176.hg.1       |
| DLST         | 0.45699555               | NM_001244883               | TC1400007691.hg.1       |
| steesku      | 0.5435216                | steesku.aAug10-unspliced   | TC1800009032.hg.1       |
| noswy        | 0.32253882               | noswy.aAug10-unspliced     | TC1500008247.hg.1       |
| swujor       | 0.6279067                | swujor.aAug10-unspliced    | TC1900011045.hg.1       |
| roysweebu    | 0.51977044               | roysweebu.aAug10-unspliced | TC0500008818.hg.1       |
| SURF6        | 0.55545616               | ENST00000629980            | TSUnmapped00000280.hg.1 |
| GSR          | 0.40518555               | NM_000637                  | TC0800010034.hg.1       |
| gapybu       | 0.4904637                | gapybu.aAug10-unspliced    | TC0100009931.hg.1       |
| SRSF5        | 0.4984582                | NM_001039465               | TC1400007562.hg.1       |
| FAM111B      | 0.4830927                | NM_001142703               | TC1100007727.hg.1       |
| TRUB2        | 0.5179548                | NM_015679                  | TC0900011634.hg.1       |
| HIST1H2AJ    | 0.41969615               | NM_021066                  | TC0600011225.hg.1       |
| SEC24B       | 0.46943778               | NM_001042734               | TC0400008376.hg.1       |
| PHF14        | 0.5191417                | NM_014660                  | TC0700006715.hg.1       |
| SNAP23       | 0.60475904               | NM_003825                  | TC1500007034.hg.1       |
| jusky        | 0.38240618               | jusky.aAug10-unspliced     | TC1800007441.hg.1       |
| TLE3         | 0.4281667                | NM_001105192               | TC1500009904.hg.1       |
| CDC25C       | 0.46098262               | NM_001287582               | TC0500012166.hg.1       |
| HIST1H2AH    | 0.5278977                | NM_080596                  | TC0600014085.hg.1       |
| ZNF625-ZNF20 | 0.4646631                | NR_037802                  | TC1900011878.hg.1       |
| CDC6         | 0.50786716               | NM_001254                  | TC1700007790.hg.1       |
| HMG2P5       | 0.5414811                | OTTHUMT00000417269         | TC1500006692.hg.1       |

| Gene Symbol   | Log2 ratio               | mRNA Accession           | Probe Set ID                 |
|---------------|--------------------------|--------------------------|------------------------------|
|               | C42B-R vs. C42B Parental |                          |                              |
| teysee        | 0.580512                 | teysee.aAug10-unspliced  | TC1900008413.hg.1            |
| SCAPER        | 0.61952037               | NM_001145923             | TC1500010097.hg.1            |
| AURKB         | 0.47502816               | NM_001256834             | TC1700009679.hg.1            |
| ZNF441        | 0.54207057               | NM_152355                | TC1900007045.hg.1            |
| zeejo         | 0.521322                 | zeejo.aAug10-unspliced   | TC0600007779.hg.1            |
| TRIM37        | 0.5006215                | NM_001005207             | TC1700011273.hg.1            |
| COG3          | 0.49696615               | NM_031431                | TC1300007070.hg.1            |
| berrer        | 0.45925748               | berrer.aAug10            | TC1500008694.hg.1            |
| DNAL1         | 0.436959                 | NM_001201366             | TC1400007653.hg.1            |
| PDCD6IP       | 0.52879274               | NM_001162429             | TC0300007004.hg.1            |
| TMEM42        | 0.67257625               | NM_144638                | TC0300007225.hg.1            |
| fernor        | 0.5464786                | fernor.aAug10-unspliced  | TC1600008535.hg.1            |
| PLCL2         | 0.54020005               | NM_001144382             | TC0300006758.hg.1            |
| METTL25       | 0.48297748               | NM_032230                | TC1200008318.hg.1            |
| NMU           | 0.5263089                | NM_001292045             | TC0400010750.hg.1            |
| TXNDC16       | 0.45140904               | NM_001160047             | TC1400009184.hg.1            |
| YIPF1         | 0.5255118                | NM_018982                | TC0100014245.hg.1            |
| H2AFX         | 0.41791686               | NM_002105                | TC1100012513.hg.1            |
| RP11-290L1.4  | 0.3945414                | ENST00000552477          | TC1200008236.hg.1            |
| TSGA10        | 0.44362015               | NM_025244                | TC0200013602.hg.1            |
| DDX39A        | 0.40208858               | NM_005804                | TC1900009820.hg.1            |
| TEX30         | 0.5548091                | NM_001286775             | TC1300009673.hg.1            |
| TPR           | 0.50444764               | NM_003292                | TC0100016709.hg.1            |
| RHPN2         | 0.52777475               | NM_033103                | TC1900010375.hg.1            |
| RP11-326A19.5 | 0.20085482               | ENST00000563131          | TC1500010380.hg.1            |
| STK36         | 0.52710193               | NM_001243313             | TC0200010806.hg.1            |
| ACOX2         | 0.4578164                | NM_003500                | TC0300011309.hg.1            |
| PAIP1         | 0.5039823                | NM_006451                | TC0500010643.hg.1            |
| JAG2          | 0.43844858               | NM_002226                | TC1400010796.hg.1            |
| CCBL2         | 0.6473662                | NM_001008661             | TC0100014848.hg.1            |
| KTN1          | 0.49453494               | NM_001079521             | TC1400007244.hg.1            |
| ZNF844        | 0.4110064                | NM_001136501             | TC1900007061.hg.1            |
| TRIP13        | 0.49076706               | NM_001166260             | TC0500006472.hg.1            |
| KIF18A        | 0.33210176               | NM_031217                | TC1100010418.hg.1            |
| OXA1L         | 0.4004507                | NM_005015                | TC1400006656.hg.1            |
| C17orf62      | 0.5676897                | NM_001033046             | TC1700012126.hg.1            |
| LOC389831     | 0.45440343               | NM_001242480             | TCUn_GL000195v100006435.hg.1 |
| kawklar       | 0.4641785                | kawklar.aAug10-unspliced | TC1800006488.hg.1            |
| gulybu        | 0.3822165                | gulybu.aAug10-unspliced  | TC0100009757.hg.1            |
| YLPM1         | 0.5396027                | NM_019589                | TC1400010627.hg.1            |
| SYNGAP1       | 0.5085994                | NM_006772                | TC0600014111.hg.1            |
| GLUDP5        | 0.5238646                | ENST00000414627          | TC1000010230.hg.1            |
| DARS2         | 0.538422                 | NM_018122                | TC0100010661.hg.1            |
| FAM21A        | 0.4975419                | NM_001005751             | TC1000007603.hg.1            |
| swyfabu       | 0.3891656                | swyfabu.aAug10-unspliced | TC1300006863.hg.1            |
| swybubo       | 0.6070396                | swybubo.aAug10-unspliced | TC0400008272.hg.1            |
| FAAH          | 0.31280243               | NM_001441                | TC0100008158.hg.1            |
| DNM1L         | 0.45855513               | NM_001278463             | TC1200007277.hg.1            |
| PEG3-AS1      | 0.53737444               | NR_023847                | TC1900008972.hg.1            |
| SRSF2         | 0.4972668                | NM_001195427             | TC1700011820.hg.1            |
| steeleyby     | 0.60206133               | steeleyby.aAug10         | TC1000007666.hg.1            |
| steyfar       | 0.6186358                | steyfar.aAug10-unspliced | TC0X00009555.hg.1            |
| ACSS1         | 0.49296528               | NM_001252675             | TC2000008722.hg.1            |
| CYB5A         | 0.626406                 | NM_001190807             | TC1800009029.hg.1            |

| Gene Symbol       | Log2 ratio               | mRNA Accession             | Probe Set ID            |
|-------------------|--------------------------|----------------------------|-------------------------|
|                   | C42B-R vs. C42B Parental |                            |                         |
| ATG4D             | 0.5405698                | NM_001281504               | TC1900006989.hg.1       |
| RP11-10G15.4      | 0.54678494               | ENST00000481228            | TC0300008527.hg.1       |
| CBS               | 0.54003733               | NM_000071                  | TC2100007491.hg.1       |
| PIGB              | 0.5241317                | NM_004855                  | TC1500007303.hg.1       |
| WNK3              | 0.47971934               | NM_001002838               | TC0X00009778.hg.1       |
| PCBP2P1           | 0.6052516                | OTTHUMT00000141397         | TC2100008163.hg.1       |
| KIF15             | 0.40996036               | ENST00000625939            | TSUnmapped00000127.hg.1 |
| BDH1              | 0.38979703               | NM_004051                  | TC0300013751.hg.1       |
| snawgley          | 0.37326625               | snawgley.aAug10-unspliced  | TC1500009186.hg.1       |
| LOC101060389      | 0.47515857               | ENST00000620683            | TC1700012242.hg.1       |
| WDR73             | 0.5780801                | NM_032856                  | TC1500010290.hg.1       |
| ECHS1             | 0.5037588                | NM_004092                  | TC1000012399.hg.1       |
| AGO4              | 0.4595127                | NM_017629                  | TC0100007784.hg.1       |
| smeedybu          | 0.4887119                | smeedybu.aAug10-unspliced  | TC0200011253.hg.1       |
| GAS2L3            | 0.39045474               | NM_001303130               | TC1200008597.hg.1       |
| HECTD2            | 0.46758094               | NM_001284274               | TC1000008435.hg.1       |
| SMIM4             | 0.68669504               | NM_001124767               | TC0300007485.hg.1       |
| smaspy            | 0.5855923                | smaspy.aAug10-unspliced    | TC1600009831.hg.1       |
| leeterbu          | 0.31373262               | leeterbu.aAug10-unspliced  | TC1800006592.hg.1       |
| wawbleeby         | 0.5481077                | wawbleeby.aAug10-unspliced | TC0700012626.hg.1       |
| ZNF30             | 0.48478946               | NM_001099437               | TC1900007826.hg.1       |
| boyboyby          | 0.48922414               | boyboyby.aAug10-unspliced  | TC1400009941.hg.1       |
| PPP1CA            | 0.54464936               | NM_001008709               | TC1100011331.hg.1       |
| PTER              | 0.61623704               | NM_001001484               | TC1000006880.hg.1       |
| SRP14             | 0.59209675               | NM_001309434               | TC1500009079.hg.1       |
| H2BFS             | 0.44539672               | OTTHUMT00000195634         | TC2100007316.hg.1       |
| rogoy             | 0.6814599                | rogoy.aAug10-unspliced     | TC0700013278.hg.1       |
| SLC25A6P2         | 0.50913954               | ENST00000497974            | TC0900006921.hg.1       |
| SSX2IP            | 0.57008034               | NM_001166293               | TC0100014762.hg.1       |
| GNMT              | 0.34421772               | NM_018960                  | TC0600008062.hg.1       |
| PABPN1            | 0.55949104               | NM_004643                  | TC1400010576.hg.1       |
| IMPDH2            | 0.4094581                | NM_000884                  | TC0300011047.hg.1       |
| TCONS_I2_00003977 | 0.48355672               | hsa_circ_0005184           | TC1000007552.hg.1       |
| BRI3              | 0.44571802               | NM_001159491               | TC0700013405.hg.1       |
| GLRX2             | 0.43001187               | NM_001243399               | TC0100016789.hg.1       |
| hirimu            | 0.47269163               | hirimu.aAug10-unspliced    | TC1000008071.hg.1       |
| ZBTB10            | 0.5351074                | NM_001105539               | TC0800008062.hg.1       |
| ZFP30             | 0.6024922                | NM_014898                  | TC1900011935.hg.1       |
| RTKN2             | 0.39857036               | NM_001282941               | TC1000010758.hg.1       |
| kyspabu           | 0.31103367               | kyspabu.aAug10-unspliced   | TC0600011636.hg.1       |
| gleyjyby          | 0.3509167                | gleyjyby.aAug10-unspliced  | TC1200011372.hg.1       |
| LYPLA1P3          | 0.5955728                | ENST00000402650            | TC0600008481.hg.1       |
| FBXW5             | 0.4641971                | NM_018998                  | TC0900012021.hg.1       |
| SLC25A5           | 0.51234466               | NM_001152                  | TC0X00008249.hg.1       |
| TRIM49D2          | 0.5248753                | NM_001105522               | TC1100011917.hg.1       |
| snarnerbu         | 0.46307427               | snarnerbu.aAug10-unspliced | TC0100014779.hg.1       |
| SENP6             | 0.6172269                | NM_001100409               | TC0600008562.hg.1       |
| PANK2             | 0.553953                 | NM_024960                  | TC2000009885.hg.1       |
| EXO1              | 0.42413324               | NM_003686                  | TC0100012172.hg.1       |
| vojaw             | 0.47500482               | vojaw.aAug10-unspliced     | TC0600011558.hg.1       |
| CBLN2             | 0.6803577                | NM_182511                  | TC1800009309.hg.1       |
| AFF4              | 0.6317016                | NM_014423                  | TC0500012032.hg.1       |
| PKM               | 0.54437214               | NM_001206796               | TC1500009952.hg.1       |
| MIR3975           | 0.40275946               | NR_039771                  | TC1800007081.hg.1       |

| Gene Symbol | Log2 ratio               | mRNA Accession            | Probe Set ID      |
|-------------|--------------------------|---------------------------|-------------------|
|             | C42B-R vs. C42B Parental |                           |                   |
| gerdaw      | 0.6541237                | gerdaw.aAug10-unspliced   | TC1500008830.hg.1 |
| PTPN20      | 0.5046494                | NM_001042357              | TC1000007533.hg.1 |
| plervubu    | 0.36976948               | plervubu.aAug10-unspliced | TC1700011739.hg.1 |
| TAF1A       | 0.5528937                | NM_001201536              | TC0100017436.hg.1 |
| SLC9A3R2    | 0.29307893               | NM_001130012              | TC1600006585.hg.1 |
| gaspoy      | 0.61143446               | gaspoy.aAug10-unspliced   | TC1500009187.hg.1 |
| CIT         | 0.5678157                | NM_001206999              | TC1200012143.hg.1 |

**Table S2.** Significantly deregulated genes found in docetaxel-resistant LNCaP<sup>R</sup> cells compared to the matched parental LNCaP cell line.

| Gene Symbol | Log2 ratio                 | mRNA Accession             | Probe Set ID            |
|-------------|----------------------------|----------------------------|-------------------------|
|             | LNCaP-R vs. LNCaP Parental |                            |                         |
| PXN         | 3.56443                    | NM_001080855               | TC1200012153.hg.1       |
| blafleybu   | 3.1122556                  | blafleybu.aAug10-unspliced | TC1100007077.hg.1       |
| PIK3R3      | 5.406014                   | NM_001114172               | TC0100014040.hg.1       |
| BLNK        | 3.5023136                  | NM_001114094               | TC1000011515.hg.1       |
| TM4SF1      | 3.545013                   | NM_014220                  | TC0300012773.hg.1       |
| TM7SF3      | 2.4072413                  | NM_016551                  | TC1200010201.hg.1       |
| DUSP16      | 2.95504                    | NM_030640                  | TC1200009967.hg.1       |
| ZNF560      | 2.5174682                  | NM_152476                  | TC1900009584.hg.1       |
| DUSP16      | 2.679847                   | ENST00000629698            | TSUnmapped00000353.hg.1 |
| ACRV1       | 2.395064                   | NM_001612                  | TC1100012712.hg.1       |
| ATP2B4      | 2.9942753                  | NM_001001396               | TC0100011267.hg.1       |
| VCY1B       | 2.769458                   | ENST00000250823            | TC0Y00006648.hg.1       |
| DHRS7       | 2.935409                   | NM_016029                  | TC1400009337.hg.1       |
| SCD5        | 2.4950082                  | NM_001037582               | TC0400011180.hg.1       |
| PCDHB13     | 4.2347374                  | NM_018933                  | TC0500008884.hg.1       |
| FAM198B     | 5.6217136                  | NM_001031700               | TC0400012245.hg.1       |
| DUSP16      | 3.1547987                  | ENST00000626461            | TSUnmapped00000088.hg.1 |
| C1QTNF3     | 4.827522                   | NM_030945                  | TC0500013298.hg.1       |
| TSPAN1      | 3.1269867                  | NM_005727                  | TC0100008145.hg.1       |
| C8orf34     | 3.3590832                  | NM_001195639               | TC0800007888.hg.1       |
| NBEAP1      | 2.6210454                  | NR_027992                  | TC1500008627.hg.1       |
| CCDC159     | 2.8617265                  | NM_001080503               | TC1900011664.hg.1       |
| SNORD116-1  | 3.182337                   | NR_003316                  | TC1500006573.hg.1       |
| ZNF98       | 2.962111                   | NM_001098626               | TC1900011920.hg.1       |
| FAT1        | 3.6916504                  | NM_005245                  | TC0400012670.hg.1       |
| wawvobo     | 2.8540244                  | wawvobo.aAug10-unspliced   | TC0400010009.hg.1       |
| GSTA1       | 2.3901138                  | NM_145740                  | TC0600012053.hg.1       |
| RTN1        | 3.6280313                  | NM_021136                  | TC1400009329.hg.1       |
| SLC44A4     | 3.9985197                  | ENST00000229729            | TC0600011464.hg.1       |
| KDM5B       | 2.466685                   | NM_006618                  | TC0100016963.hg.1       |
| CYP3A5      | 4.202087                   | NM_000777                  | TC0700011953.hg.1       |
| SAT1        | 3.286477                   | NM_002970                  | TC0X00006799.hg.1       |
| DUSP16      | 2.8812482                  | ENST00000628303            | TSUnmapped00000374.hg.1 |
| goggerbu    | 3.1548991                  | goggerbu.aAug10-unspliced  | TC0300009346.hg.1       |
| SLFN5       | 3.8060744                  | NM_144975                  | TC1700007585.hg.1       |
| TMEFF2      | 4.331773                   | NM_001305134               | TC0200015266.hg.1       |
| APLP2       | 3.5663965                  | NM_001142276               | TC1100009521.hg.1       |
| ADAM7       | 3.7644048                  | NM_003817                  | TC0800007043.hg.1       |
| goyfloby    | 3.8766327                  | goyfloby.bAug10            | TC0700011263.hg.1       |
| TNFSF15     | 4.8133583                  | NM_001204344               | TC0900011300.hg.1       |
| noychorby   | 2.916827                   | noychorby.aAug10-unspliced | TC0700007194.hg.1       |

| Gene Symbol   | Log2 ratio                 | mRNA Accession              | Probe Set ID      |
|---------------|----------------------------|-----------------------------|-------------------|
|               | LNCaP-R vs. LNCaP Parental |                             |                   |
| NOSTRIN       | 4.1041965                  | NM_001171631                | TC0200009902.hg.1 |
| TRIM38        | 6.0442314                  | NM_006355                   | TC0600007257.hg.1 |
| MPP6          | 2.543276                   | NM_001303037                | TC0700006945.hg.1 |
| CAMKK2        | 3.507546                   | NM_001270485                | TC1200012199.hg.1 |
| GPD2          | 3.095948                   | NM_000408                   | TC0200016548.hg.1 |
| RAB25         | 3.190944                   | NM_020387                   | TC0100010149.hg.1 |
| smoplobu      | 2.6784763                  | smoplobu.aAug10-unspliced   | TC0900009968.hg.1 |
| rekimu        | 4.141984                   | rekimu.aAug10-unspliced     | TC0700011707.hg.1 |
| RP11-507F16.1 | 5.618927                   | ENST00000529684             | TC1100012808.hg.1 |
| KLK3          | 4.8988104                  | NM_001030047                | TC1900008607.hg.1 |
| SLC25A40      | 3.9717932                  | NM_018843                   | TC0700011710.hg.1 |
| ARHGEF38      | 3.6656058                  | NM_001242729                | TC0400012829.hg.1 |
| DIO1          | 4.1902857                  | NM_000792                   | TC0100008366.hg.1 |
| AZGP1         | 2.8848197                  | NM_001185                   | TC0700011962.hg.1 |
| PLK2          | 5.4971914                  | NM_001252226                | TC0500010835.hg.1 |
| NETO1         | 3.4014995                  | NM_001201465                | TC1800009011.hg.1 |
| BMPR1B        | 5.578164                   | NM_001203                   | TC0400008183.hg.1 |
| DAZAP2        | 3.2398264                  | NM_001136264                | TC1200012629.hg.1 |
| RYR2          | 3.2929828                  | NM_001035                   | TC0100012113.hg.1 |
| AAK1          | 3.058343                   | NM_014911                   | TC0200012961.hg.1 |
| MDM2          | 3.3790278                  | NM_001145337                | TC1200008116.hg.1 |
| CDK19         | 3.7037866                  | NM_001300960                | TC0600012839.hg.1 |
| GDF15         | 3.70373                    | NM_004864                   | TC1900007384.hg.1 |
| TP53INP1      | 3.9261022                  | NM_001135733                | TC0800011150.hg.1 |
| snervobo      | 4.52474                    | snervobo.aAug10-unspliced   | TC0400008186.hg.1 |
| LOC731631     | 5.7967405                  | LOC731631.aAug10-unspliced  | TC0700011175.hg.1 |
| PCDHB5        | 5.765707                   | NM_015669                   | TC0500013241.hg.1 |
| slersweebu    | 19,323046                  | slersweebu.aAug10-unspliced | TC0400009613.hg.1 |
| GLS2          | 7.000437                   | NM_001280796                | TC1200010921.hg.1 |
| TRPM8         | 4.079079                   | NM_024080                   | TC0200011147.hg.1 |
| PALMD         | 4.425948                   | NM_017734                   | TC0100009183.hg.1 |
| SH3BGR1       | 7.9054246                  | NM_003022                   | TC0X00007744.hg.1 |
| slukeebu      | 7.0748277                  | slukeebu.aAug10-unspliced   | TC0300013147.hg.1 |
| GULP1         | 5.202367                   | NM_001252668                | TC0200010236.hg.1 |
| ACOX2         | 5.0355625                  | NM_003500                   | TC0300011309.hg.1 |
| C1QTNF3-AMACR | 8.091464                   | NR_037951                   | TC0500013296.hg.1 |
| ANK3          | 4.1974845                  | NM_001149                   | TC1000010727.hg.1 |
| PCDHB14       | 5.4201503                  | NM_018934                   | TC0500013247.hg.1 |
| skargluby     | 4.1027513                  | skargluby.aAug10-unspliced  | TC0600011669.hg.1 |
| BTG2          | 4.8146367                  | NM_006763                   | TC0100011253.hg.1 |
| ZDHHC15       | 6.922595                   | NM_001146256                | TC0X00010107.hg.1 |
| NLGN4X        | 8.998397                   | NM_001282145                | TC0X00008989.hg.1 |
| LCP1          | 6.141706                   | NM_002298                   | TC1300008840.hg.1 |
| CDKN1A        | 9.6522665                  | NM_000389                   | TC0600007847.hg.1 |
| CLDN8         | 5.451458                   | NM_199328                   | TC2100007881.hg.1 |
| LOC650226     | 26.9515                    | NR_029420                   | TC0700011180.hg.1 |
| AMACR         | 8.110192                   | NM_001167595                | TC0500013297.hg.1 |
| GLYATL1       | 6.244707                   | NM_001220494                | TC1100013009.hg.1 |
| nona          | 8.164134                   | nona.aAug10-unspliced       | TC0700011177.hg.1 |
| RP11-310H4.6  | 14.055634                  | ENST00000432235             | TC0700011150.hg.1 |
| ADAMTS1       | 8.51847                    | NM_006988                   | TC2100007821.hg.1 |
| ROR1          | 13.5492325                 | NM_001083592                | TC0100008594.hg.1 |
| SESN3         | 13.418033                  | NM_001271594                | TC1100012019.hg.1 |
| RP11-945A11.1 | 6.5589886                  | ENST00000534068.1           | TC1100007088.hg.1 |

| Gene Symbol | Log <sub>2</sub> ratio     | mRNA Accession              | Probe Set ID      |
|-------------|----------------------------|-----------------------------|-------------------|
|             | LNCaP-R vs. LNCaP Parental |                             |                   |
| SYT4        | 26.85892                   | NM_020783                   | TC1800008550.hg.1 |
| OR51E1      | 58.01366                   | NM_152430                   | TC1100006663.hg.1 |
| ABCB1       | 10.353241                  | NM_000927                   | TC0700011706.hg.1 |
| FIRRE       | 17.908964                  | NR_026975                   | TC0X00010826.hg.1 |
| skoyplorby  | 42.785618                  | skoyplorby.aAug10-unspliced | TC0400012717.hg.1 |
| MAGEC2      | 57.19087                   | NM_016249                   | TC0X00011001.hg.1 |
| RUNDC3B     | 174.82712                  | NM_001134405                | TC0700008261.hg.1 |
| TNFSF10     | 392,64548                  | NM_001190942                | TC0300013146.hg.1 |
| PTGFR       | 0.04011484                 | NM_000959                   | TC0100008812.hg.1 |
| GNAI1       | 0.024177328                | NM_001256414                | TC0700008181.hg.1 |
| DEPDC1      | 0.040950254                | NM_001114120                | TC0100014543.hg.1 |
| ADAMTSL3    | 0.07627707                 | NM_001301110                | TC1500008127.hg.1 |
| BEND4       | 0.14824328                 | NM_001159547                | TC0400010553.hg.1 |
| PCDH7       | 0.035351582                | NM_001173523                | TC0400007169.hg.1 |
| SLC22A3     | 0.08989562                 | NM_021977                   | TC0600010078.hg.1 |
| EFNA5       | 0.101759985                | NM_001962                   | TC0500011648.hg.1 |
| PEG3        | 0.11878157                 | NM_001146184                | TC1900011542.hg.1 |
| TMEM45A     | 0.15066868                 | NM_018004                   | TC0300008148.hg.1 |
| BLMH        | 0.22832285                 | NM_000386                   | TC1700010274.hg.1 |
| HENMT1      | 0.17933251                 | NM_001102592                | TC0100015171.hg.1 |
| ANKRD18A    | 0.14581032                 | NM_147195                   | TC0900010056.hg.1 |
| LRRN1       | 0.106709786                | NM_020873                   | TC0300006465.hg.1 |
| LPAL2       | 0.17920749                 | NR_028092                   | TC0600013780.hg.1 |
| POT1        | 0.32487112                 | NM_001042594                | TC0700012479.hg.1 |
| ATP1B1      | 0.13123657                 | NM_001677                   | TC0100010543.hg.1 |
| FAM72B      | 0.23223388                 | NM_001100910                | TC0100015509.hg.1 |
| chysloby    | 0.17447013                 | chysloby.aAug10-unspliced   | TC0500011649.hg.1 |
| NMU         | 0.21303496                 | NM_001292045                | TC0400010750.hg.1 |
| RCN3        | 0.24691214                 | NM_020650                   | TC1900008544.hg.1 |
| KCNQ5       | 0.20526414                 | NM_001160130                | TC0600008509.hg.1 |
| HIST1H2BG   | 0.21723571                 | NM_003518                   | TC0600011136.hg.1 |
| STXBP5L     | 0.2826764                  | NM_001308330                | TC0300008524.hg.1 |
| MAOA        | 0.31229696                 | NM_000240                   | TC0X00007053.hg.1 |
| SEMA6A      | 0.15992631                 | NM_001300780                | TC0500011775.hg.1 |
| LIN7A       | 0.24104224                 | NM_004664                   | TC1200011385.hg.1 |
| MAP1B       | 0.07084352                 | NM_005909                   | TC0500007738.hg.1 |
| GBE1        | 0.30894694                 | NM_000158                   | TC0300011651.hg.1 |
| UGT2B15     | 0.1385326                  | NM_001076                   | TC0400012924.hg.1 |
| KIF20B      | 0.31401816                 | NM_001284259                | TC1000008406.hg.1 |
| MYNN        | 0.24139714                 | NM_001185118                | TC0300009451.hg.1 |
| DSEL        | 0.27489787                 | NM_032160                   | TC1800008952.hg.1 |
| SH3RF1      | 0.2832188                  | NM_020870                   | TC0400012378.hg.1 |
| skersworby  | 0.24907549                 | skersworby.aAug10-unspliced | TC0300008083.hg.1 |
| RDH10       | 0.15124539                 | NM_172037                   | TC0800007957.hg.1 |
| FAM72D      | 0.317396                   | NM_207418                   | TC0100009723.hg.1 |
| HIST1H1B    | 0.21291079                 | NM_005322                   | TC0600011232.hg.1 |
| forskarbu   | 0.28344628                 | forskarbu.aAug10-unspliced  | TC0800010055.hg.1 |
| DGKH        | 0.31261846                 | NM_001204504                | TC1300006987.hg.1 |
| CDH26       | 0.1793008                  | NM_021810                   | TC2000007943.hg.1 |
| FAM72A      | 0.28322527                 | NM_001123168                | TC0100017094.hg.1 |
| zorreybo    | 0.27864584                 | zorreybo.aAug10-unspliced   | TC0100008257.hg.1 |
| MIR548T     | 0.24622196                 | NR_036093                   | TC0400009324.hg.1 |
| FAM213A     | 0.2520724                  | NM_001243778                | TC1000008234.hg.1 |
| UGT2B17     | 0.17604344                 | NM_001077                   | TC0400012923.hg.1 |

---

| Gene Symbol | Log2 ratio                 | mRNA Accession           | Probe Set ID      |
|-------------|----------------------------|--------------------------|-------------------|
|             | LNCaP-R vs. LNCaP Parental |                          |                   |
| XAGE1B      | 0.31227544                 | NM_001097594             | TC0X00007285.hg.1 |
| ploroby     | 0.24817838                 | ploroby.aAug10-unspliced | TC1000006474.hg.1 |
| CENPJ       | 0.38357082                 | NM_018451                | TC1300008371.hg.1 |

---
